# 1 Hospital environments harbor chlorhexidine tolerant bacteria potentially 2 linked to chlorhexidine persistence in the environment

3 Jiaxian Shen<sup>1</sup>, Yuhan Weng<sup>1</sup>, Tyler Shimada<sup>1</sup>, Meghana Karan<sup>1</sup>, Andrew Watson<sup>1</sup>, Rachel L.  
4 Medernach<sup>2</sup>, Vincent B. Young<sup>3</sup>, Mary K. Hayden<sup>2</sup>, Erica M. Hartmann<sup>1,4,5,\*</sup>

5 <sup>1</sup>Department of Civil and Environmental Engineering, McCormick School of Engineering,  
6 Northwestern University, USA

7 <sup>2</sup>Division of Infectious Diseases, Department of Internal Medicine, Rush University Medical  
8 Center, USA

9 <sup>3</sup>Department of Internal Medicine/Division of Infectious Diseases, Department of Microbiology  
10 & Immunology, University of Michigan Medical School, USA

11 <sup>4</sup>Center for Synthetic Biology, Northwestern University, USA

12 <sup>5</sup>Department of Medicine/Division of Pulmonary Medicine, Feinberg School of Medicine,  
13 Northwestern University, USA

14 \*Correspondence: Erica M. Hartmann; 2145 Sheridan Road, Tech A322, Evanston, IL 60208;  
15 Email: [erica.hartmann@northwestern.edu](mailto:erica.hartmann@northwestern.edu); Tel: 847-467-4528

## 16 Abstract

17 A One Health approach is essential in combating antibiotic and antimicrobial resistance.  
18 Chlorhexidine (di)gluconate (CHG), a widely used antiseptic in medical intensive care units  
19 (MICU), has recently come under scrutiny. However, studies on CHG tolerance, particularly in  
20 interconnected indoor environments, are limited. We comprehensively explored CHG tolerance  
21 in MICU environments from chemical, microbial, and molecular perspectives. Using microcosm  
22 experiments and field surveys, we demonstrated that CHG, if transferred from patient skin to  
23 environments, can persist on surfaces despite cleaning and disinfection and decrease to sublethal  
24 levels for clinically relevant bacteria. We detected widespread CHG-tolerant bacteria ( $\geq 18.75$   
25  $\mu\text{g/mL}$ ), including opportunistic pathogens (e.g., *Pseudomonas aeruginosa*, *Stenotrophomonas*  
26 *maltophilia*, *Elizabethkingia miricola*), with minimum inhibitory concentrations up to 512  
27  $\mu\text{g/mL}$ . Sink drains emerged as critical hotspots, and indoor air as a potential transport  
28 mechanism. We observed indications of bacterial persistence, increased tolerance, in-situ  
29 evolution, and dissemination across MICU rooms. Molecular analyses revealed heterogeneous  
30 and largely unexplored CHG resistance mechanisms and identified resistance determinant  
31 candidates, particularly *qacEdelta1*-carrying, plasmid-borne multidrug-resistant cassettes. Our  
32 findings underscore the importance of understanding human-environment and chemical-microbe  
33 interactions to preserve chlorhexidine's efficacy and inform infection prevention strategies. We  
34 advocate for integrated environmental management and clinical interventions under the One  
35 Health framework.

## 36 Introduction

37 The emergence of resistance to antimicrobials is a critical concern worldwide, severely limiting  
38 our ability to prevent and treat infections. Chlorhexidine digluconate (CHG) has been widely  
39 used as a topical antiseptic in hospitals), both for patient skin antisepsis and for healthcare  
40 provider hand hygiene. Other clinical applications of CHG include antiseptic bathing of residents  
41 of long-term care facilities, skin preparation before invasive outpatient procedures and surgeries,  
42 and as a mouthwash for treating gingivitis. Additionally, it is extensively utilized in veterinary  
43 medicine. Chlorhexidine has broad antimicrobial activity – it is bactericidal at higher  
44 concentrations (>0.12%) and bacteriostatic at lower concentrations (0.02%-0.06%)<sup>1</sup> – and it has  
45 been used for decades with little concern for resistance. While daily bathing of patients with 2%  
46 (20,000 µg/mL) CHG has served as an effective measure for prevention of healthcare-associated  
47 infections<sup>2-4</sup>, exposure of bacteria to sublethal concentrations of chlorhexidine can lead to  
48 reduced susceptibility to this antiseptic and other clinically relevant antibiotics (e.g.,  
49 erythromycin, clindamycin, daptomycin, vancomycin, azithromycin and ciprofloxacin)<sup>5-8</sup>. Post-  
50 application, CHG may be shed from the skin onto indoor surfaces, resulting in sublethal  
51 concentrations of CHG in the patient’s surrounding environment. Furthermore, CHG residuals  
52 might persist in the built environment, even after undergoing degradation by heat, light, and  
53 other chemicals<sup>9-11</sup>.

54 Decreased susceptibility to CHG has been observed in various bacterial taxa (e.g., *Acinetobacter*  
55 spp., *Pseudomonas* spp., *Enterobacter* spp., and *Enterococcus* spp.), including clinically  
56 significant pathogens (e.g., *Klebsiella pneumoniae*, methicillin-resistant *Staphylococcus aureus*  
57 [MRSA]). Cross-resistance of these isolates to colistin has also been observed, raising concerns  
58 about unintended consequences of CHG application in healthcare settings<sup>12-14</sup>. Studies have  
59 obtained correlations between CHG susceptibility and antibiotic susceptibility in both minimum  
60 inhibitory concentrations (MICs) and minimum bactericidal concentrations (MBCs) among  
61 Gram-negative bacteria, and MBCs among Gram-positive bacteria<sup>15</sup>. Sporadic cases of hospital  
62 infection outbreaks caused by highly CHG-resistant *Serratia marcescens* strains have been  
63 reported<sup>16-19</sup>. The concern is magnified considering the inductive effect of widely used  
64 antimicrobial chemicals (e.g., triclosan, CHG) on the dissemination of antibiotic resistance genes  
65 (ARGs)<sup>20,21</sup>, and the possibility that mobile antibiotic resistance elements could transfer from  
66 environmental bacteria to human pathogens. In a veterinary hospital, multi-drug resistant  
67 *Serratia* isolates with similar resistance profiles were detected from animals and CHG solutions  
68 used across the hospital. Furthermore, the authors identified an IncHI2 multi-drug resistance  
69 plasmid that is shared by these *Serratia* isolates and an *Enterobacter hormaechei* strain  
70 previously recovered from the hospital environment, with the plasmid’s mobility confirmed by  
71 conjugation experiments<sup>19</sup>.

72 Generally, studies about CHG tolerance are restricted to human subjects (e.g., clinical isolates  
73 from patients, especially those on the WHO priority list of antibiotic-resistant bacteria), while  
74 little attention has been paid to the surrounding environments, which can serve as hotspots of  
75 antibiotic-resistant bacteria and hospital-acquired infections. To date, CHG susceptibility of  
76 environmental microbes has been reported only sporadically. These reports are often associated  
77 with outbreak investigations<sup>19,22-24</sup>, while comprehensive surveillance is lacking. Comprehensive  
78 CHG surveillance is partly impeded by the lack of standardized terms, including resistance,  
79 tolerance, and reduced susceptibility. In this study, we defined chlorhexidine resistance using  
80 epidemiological cut-off values proposed previously (Table S1)<sup>12,25,26</sup>, due to the lack of  
81 standardized clinical breakpoints for chlorhexidine<sup>27</sup>. The values were defined as the upper limit  
82 of the normal MIC distribution for a given antimicrobial and wild-type species. Clinical  
83 implications of these values are unclear, but they are nevertheless helpful in resistance  
84 monitoring. In cases where epidemiological cut-offs are also unknown, we interchangeably used  
85 the terms tolerance and reduced susceptibility as general descriptors. In this study, chlorhexidine  
86 digluconate was used for MIC measurements, and chlorhexidine MICs were used as a general  
87 term for MICs reported by previous studies where the chemical was not explicitly stated. In cases  
88 where the taxonomy or the epidemiological cut-off values were unknown, for uniformity  
89 reasons, we described MICs  $\geq 128$   $\mu\text{g}/\text{mL}$  as high CHG MICs, MICs of 512  $\mu\text{g}/\text{mL}$  as the  
90 highest CHG MICs, and bacteria that grew at 18.75  $\mu\text{g}/\text{mL}$  CHG as CHG tolerant<sup>3</sup>.

91 In this study, we conducted the most comprehensive exploration of CHG tolerance in MICU  
92 environments to date, examining chemical, microbial, and molecular aspects. Through controlled  
93 microcosm experiments, we gained insights into the fate of CHG on surfaces and the factors  
94 influencing its persistence. In subsequent field surveys, we identified environmental hotspots  
95 harboring CHG-tolerant, opportunistic, persistent, and disseminating bacteria. Additionally, we  
96 identified candidate and novel ARGs and mobile genetic cassettes potentially associated with  
97 CHG tolerance.

## 98 Results

### 99 Residual chlorhexidine persists on surfaces under disinfection and cleaning in 100 microcosm experiments

101 CHG in the environment can degrade naturally due to environmental factors such as heat and  
102 light. Additionally, physical removal through cleaning or reactions with cleaning products may  
103 decrease residual surface concentrations. We investigated CHG persistence on three common  
104 hospital surface types - laminate wood, plastic (high-density polyethylene; HDPE), and metal  
105 (stainless steel) - under six cleaning practices. These practices included no cleaning, cleaning

106 with water, and disinfecting with ethanol, bleach, peracetic acid, or benzalkonium chloride (Fig.  
107 S1).

108 While the concentration of CHG decreased over time, it persisted on indoor surfaces over 24 h  
109 (Fig. 1a, Table S2). The persistence patterns of CHG residual were impacted by surface material  
110 and cleaning practice. We first investigated the immediate impact of wiping a surface on CHG  
111 persistence by comparing the concentrations at time 0 (i.e., the amount applied) and 10 min (i.e.,  
112 0.17 h). Among the cleaning practices, wiping with peracetic acid had the largest immediate  
113 impact, showing significant differences on plastic and laminate wood surfaces ( $p < 0.02$ ) and  
114 approaching significance on metal surfaces ( $p = 0.056$ ). This is supported by previous evidence  
115 that CHG can be inactivated at a low pH and in the presence of anionic molecules<sup>28-30</sup>. In  
116 contrast, none of the other disinfectants tested are known to interact with CHG. Benzalkonium  
117 chloride and ethanol have been shown to have synergistic or additive antimicrobial properties  
118 when applied with CHG, indicating that their co-occurrence will not cause chlorhexidine  
119 degradation<sup>31-35</sup>. This is concordant with our observation that CHG concentration is not  
120 significantly affected by benzalkonium chloride or ethanol application.

121 Although CHG concentration significantly decreased after 24 h on all cleaned surfaces, it still  
122 persisted on indoor surfaces with residual concentrations ranging from 7.0 to 12.3  $\mu\text{g}/\text{cm}^2$  (Fig.  
123 1a). When cleaning was not conducted, CHG concentrations remained stable on laminate wood  
124 and plastic surfaces, whereas a significant decrease was observed on metal surfaces ( $p = 0.005$ ).  
125 While all cleaning methods induced significant concentration reductions after 24 h (Fig. 1a),  
126 only cleaning plastic and laminate wood showed a significantly greater reduction effect than no  
127 cleaning ( $p < 0.05$ ), whereas disinfecting did not statistically differ from cleaning with water  
128 (Fig. 1b). This suggests that, for all tested surface types, potential interactions between  
129 disinfecting chemicals and CHG do not exhibit a notably greater reduction effect than the  
130 physical removal of CHG during cleaning. Our findings align with previous indications that  
131 chlorhexidine degradation might be catalyzed by metals and that chlorhexidine is unstable under  
132 acidic and alkaline conditions (pH 3.5-6.5 and pH > 8.5)<sup>36</sup>.



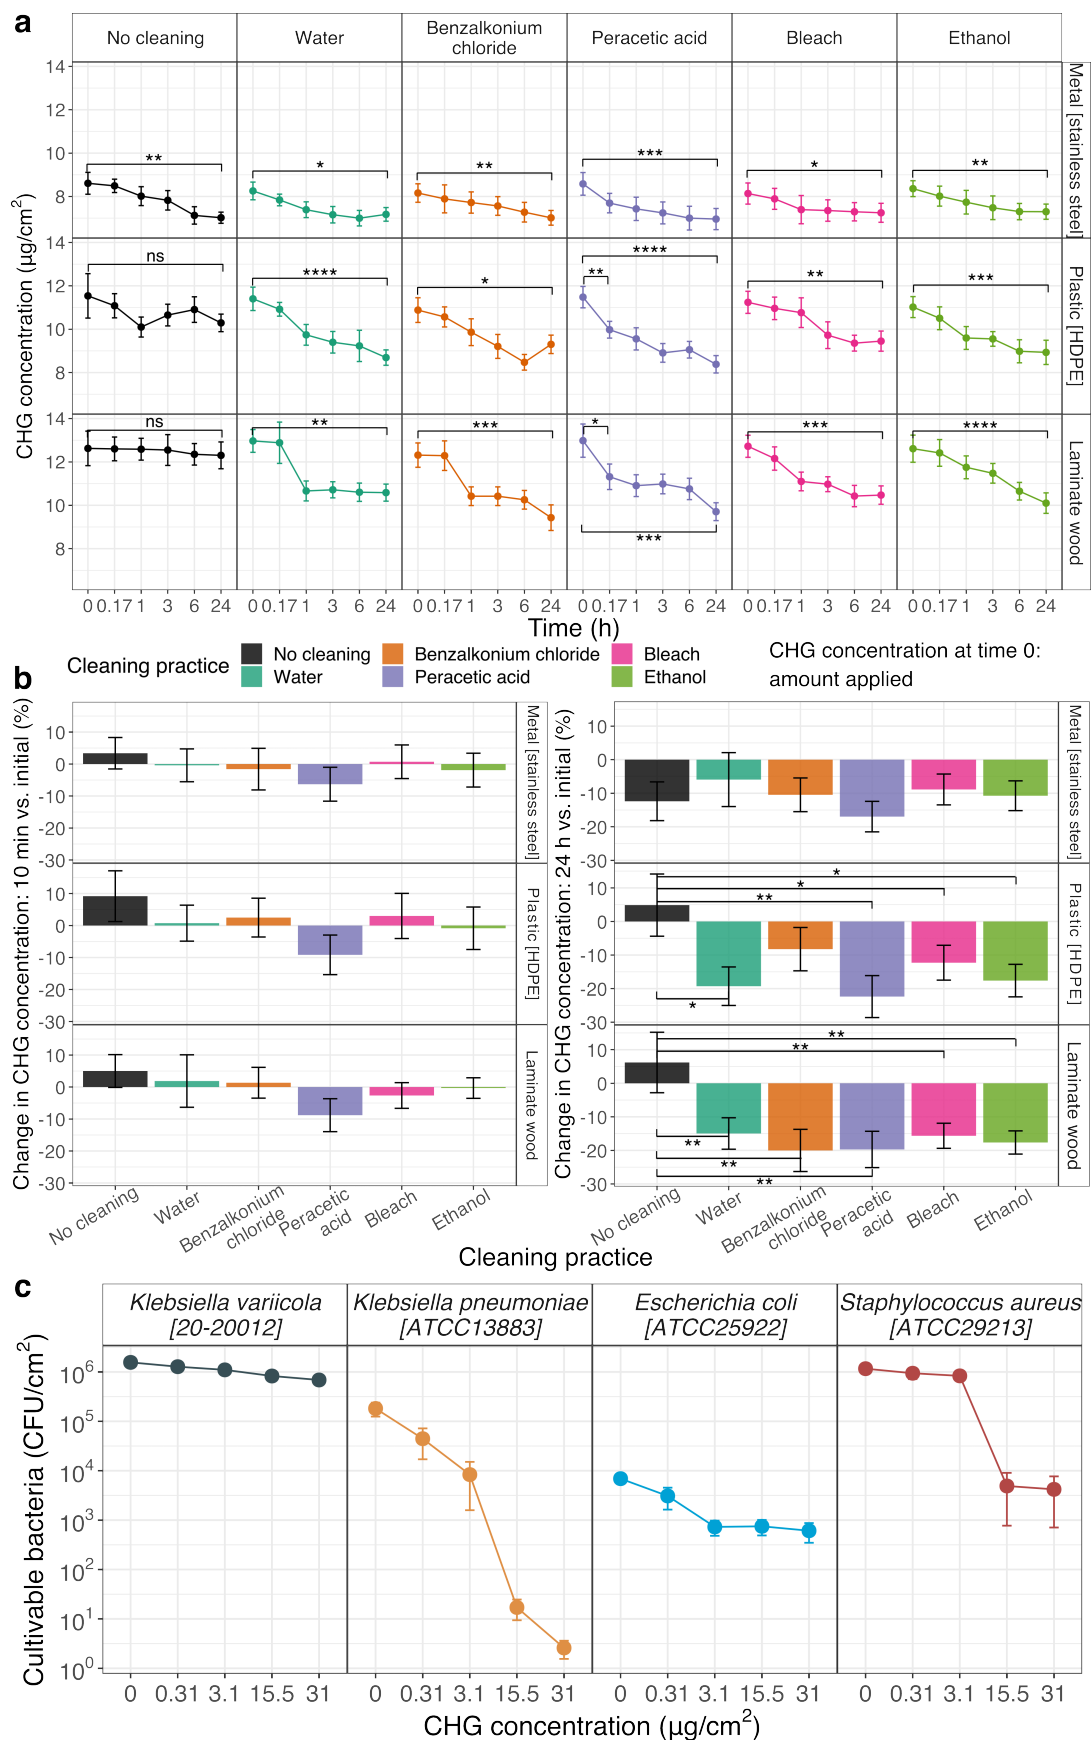

134 **Fig. 1 Residual CHG persists on surfaces despite cleaning and disinfection, with**  
135 **concentrations decreasing to sublethal levels for clinically relevant bacteria. a)** The change  
136 patterns of CHG concentrations on surfaces over time in response to cleaning and disinfection.  
137 Significance was determined by paired *t*-tests with the alternative hypothesis that the CHG  
138 concentration at 0 h was greater than that at 0.17 h (or 24 h). For the immediate impact (0 h vs  
139 0.17 h), only groups with significant differences were labeled for visual clarity. Recovery rates in  
140 sampling and measurement were accounted for in the calculations. **b)** Immediate and long-term  
141 reduction effects of cleaning practices across surface types. Significance was determined by  
142 pairwise *t*-tests relative to the “no cleaning” group or the “cleaning with water” group, with the  
143 alternative hypothesis that the tested groups had a greater reduction effect than the reference  
144 group. Multi-test *p*-values were adjusted using the Benjamini-Hochberg method. Only significant  
145 associations were labeled; thus, only cleaning plastic and laminate wood showed a significantly  
146 greater reduction effect than no cleaning. **c)** Clinically relevant bacteria can survive 24-hour  
147 exposure to CHG residual concentrations on plastic surfaces.

### 148 **Clinically relevant bacteria can survive 24 h low-dose chlorhexidine exposure on** 149 **surfaces**

150 We examined the survival of four clinically relevant bacterial isolates (*Escherichia coli* [ATCC  
151 25922], *Klebsiella pneumoniae* [ATCC 13883], *Klebsiella variicola* [20-20012]<sup>37</sup>,  
152 *Staphylococcus aureus* [ATCC 29213]) on plastic surfaces after exposure to CHG for 24 h (Fig.  
153 1c). Plastic was selected as a representative surface because it is a common material of  
154 equipment in the immediate vicinity of patients and healthcare workers (e.g., bedrail, nurse call  
155 button, keyboard, mouse). Five concentrations of CHG (31.00, 15.50, 3.10, 0.31, and 0 µg/cm<sup>2</sup>)  
156 were tested to encompass the range persisting on surfaces after cleaning or disinfection.

157 After 24 h, all species of bacteria survived on CHG-treated surfaces across all tested microbial  
158 densities and CHG concentrations (2.58 – 1.28×10<sup>6</sup> CFU/cm<sup>2</sup>, log<sub>10</sub> reduction ranging from 0.08  
159 to 4.87). Although fewer *Klebsiella pneumoniae* CFUs survived at 15.5 and 31 µg/cm<sup>2</sup> CHG, an  
160 estimation from the data trend suggests that >17 CFU/cm<sup>2</sup> could survive at CHG concentrations  
161 of 8.4-11.5 µg/cm<sup>2</sup> (range of CHG persisting on plastic surfaces). As previous studies have linked  
162 exposure to sublethal concentrations of chlorhexidine with reduced susceptibility to chlorhexidine  
163 and clinical antibiotics such as vancomycin and daptomycin<sup>6-8,38</sup>, these results raise concerns about  
164 potential development of antimicrobial resistance in bacteria on surfaces that possibly harbor CHG  
165 residues (e.g., hospital environments where patients are bathed with CHG).

### 166 **Chlorhexidine-tolerant bacteria are widespread in MICU environments with sink** 167 **drains being critical hotspots**

168 Our microcosm experiments indicated that the environment may serve as a hotspot for CHG-  
169 tolerant bacteria. To determine how widespread CHG tolerance is *in situ*, we further conducted a  
170 field survey of environmental locations in a MICU (Methods, Fig. S2). Cultivation yielded a  
171 total of 1415 isolates of 345 different phenotypic morphologies, of which 306 isolates (21.6%)

172 were confirmed to grow at 18.75  $\mu\text{g}/\text{mL}$  CHG at 25  $^{\circ}\text{C}$  (Fig. S3). In this study, 18.75  $\mu\text{g}/\text{mL}$  was  
173 used as the threshold to describe CHG tolerance of bacteria<sup>3</sup>. Additionally, 203 isolates (14.3%)  
174 were suspected to grow; due to colony proximity on the agar, it was difficult to determine  
175 whether they grew independently or were protected by neighboring colonies. All 509 isolates  
176 (36.0%) underwent CHG MIC testing.

177 We found that unit area surface bioburden in the MICU was significantly associated with touch  
178 and cleaning frequencies (see Methods for definitions of touch frequencies), and the overall trend  
179 was consistent with a previous study<sup>39</sup>. The rarely cleaned doorsills had significantly higher  
180 bioburden than high-touch bedrails and nurse call buttons, followed by medium-touch keyboards  
181 (unpaired *t*-tests,  $\log_{10}$  scale) (Fig. 2a). This trend was also consistent for the absolute bioburden  
182 in the entirety of the surfaces (Fig. S4). The absolute bioburden on low-touch light switches was  
183 the lowest. However, they exhibited the highest unit area bioburden among dry surfaces. It is  
184 worth noting that the switches had the smallest surface area (Table S3), which may have  
185 contributed to greater uncertainty in calculating the unit area bioburden. No effect of sampling  
186 seasons and patient room isolation status (contact isolation or not) was observed (Fig. S5).

187 Despite CHG primarily being applied to patient skin, CHG tolerance was identified in multiple  
188 spatially distinct locations within the MICU. Most bacteria on dry surfaces were not CHG  
189 tolerant at 25 $^{\circ}\text{C}$  (Fig. 2b), defined as the ability to grow at 18.75  $\mu\text{g}/\text{mL}$  CHG. The percentages  
190 of bacteria exhibiting tolerance did not significantly differ among dry surfaces, with mean  
191 percentages ranging from 0% (keyboards in patient rooms, light switches in the hallway) to  
192 13.2% (nurse call buttons). Potential pathogens (as indicated by  $\beta$  hemolysis on blood agar at  
193 37  $^{\circ}\text{C}$ ) were detected across all environmental locations<sup>40</sup>. However, doorsills were the only dry  
194 surfaces where CHG tolerance at 37  $^{\circ}\text{C}$  was detected (Fig. 2c, 32  $\mu\text{g}/\text{mL}$  - one isolate, 64  $\mu\text{g}/\text{mL}$   
195 - four isolates). There was also a slight trend of a subpopulation of doorsill samples harboring  
196 high proportions of CHG tolerant bacteria (3 out of 59 samples had percentages >90%).

197 Sink drains were critical hotspots for absolute bioburden (Fig. S4), CHG tolerance (Fig. 2b-c),  
198 and potential pathogens (Fig. 2c). The absolute bioburden and proportion of CHG-tolerant  
199 bacteria in sink drains were significantly higher than on all dry surfaces ( $p \leq 0.0001$ ). Moreover,  
200 37 bacterial isolates with high CHG MICs ( $\geq 128 \mu\text{g}/\text{mL}$ ) were detected from sink drains in  
201 patient rooms, medication rooms, and MICU hallways (128  $\mu\text{g}/\text{mL}$  - 17 isolates, 256  $\mu\text{g}/\text{mL}$  - 10  
202 isolates, 512  $\mu\text{g}/\text{mL}$  - 10 isolates) (Fig. 2c). Of the CHG-tolerant bacteria at 25  $^{\circ}\text{C}$  from the sink  
203 drains, 70.6% (127 out of 180 isolates) were  $\beta$ -hemolytic (a highly predictive indication of  
204 pathogenicity<sup>40</sup>), including these with high MICs (24 out of 29 isolates, Fig. 2c).

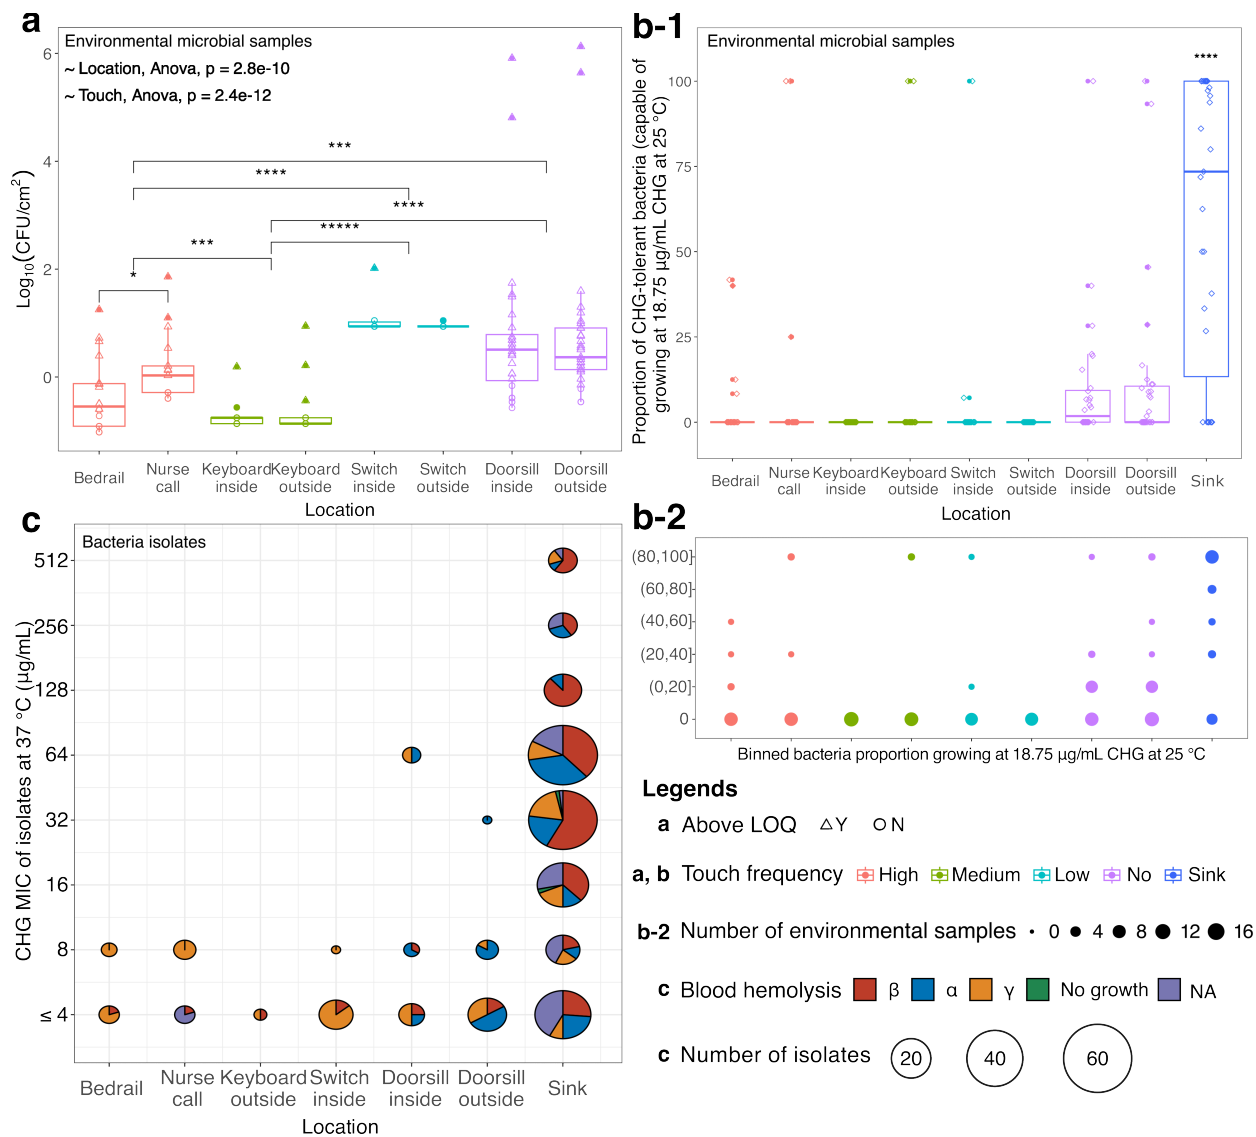

205

206 **Fig. 2 Chlorhexidine-tolerant bacteria are widespread in MICU environments with sink**  
 207 **drains being critical hotspots. a)** Unit area bioburden of bacteria across different touch  
 208 frequencies on dry surfaces (cultivation temperature: 25 °C). CFU: colony forming unit. To  
 209 avoid mis-interpreting data with small colony counts, we set the limit of quantification (LOQ) of  
 210 our culture efforts as colony counts = 3. Values below this threshold were recorded as half of  
 211 LOQ (i.e., 1.5). **b)** Proportion of bacteria tolerant to 18.75  $\mu\text{g/mL}$  CHG (described as CHG  
 212 tolerant in this study) at 25 °C across different touch frequencies on dry surfaces and sink. The  
 213 proportion of sink samples was significantly higher than that of all the other touch groups  
 214 according to unpaired *t*-tests ( $p \leq 0.0001$  for all comparisons). In both a) and b), only significant  
 215 comparisons were labeled for visual clarity. **c)** Of the bacterial isolates growing at 18.75  $\mu\text{g/mL}$   
 216 CHG at 25 °C, distribution of their CHG MICs at 37 °C and the corresponding blood hemolysis  
 217 status. Nurse call button is abbreviated as nurse call in the figure.

## 218 **Opportunistic pathogens and high CHG MIC bacteria were detected in MICU** 219 **environments with increased tolerance and potential for persistence**

220 To further investigate their potential clinical importance and genomic resistance mechanisms, we  
221 performed whole-genome sequencing on 63 isolates (Fig. S6, Table S4). The isolates were  
222 randomly selected, with efforts to ensure coverage of various colony morphologies and MICs.  
223 Additionally, comparisons were prioritized by selecting isolates with different MICs but the  
224 same colony morphology. Among these, the three most represented species are opportunistic  
225 pathogens: *Stenotrophomonas maltophilia* (n = 19), *Elizabethkingia miricola* (n = 7), and  
226 *Pseudomonas aeruginosa* (n = 6). Isolates with high CHG MICs were detected among these  
227 species, with the highest values being 128, 512, and 128 µg/mL, respectively. Notably, all these  
228 isolates were recovered from sink drains located in diverse spaces across patient rooms,  
229 medication rooms, and hallways, except for one *S. maltophilia* isolate from a doorsill in the  
230 hallway. Additionally, we detected two *Acinetobacter radioresistens* isolates from the doorsill of  
231 a patient room, both carrying the carbapenemase gene *bla*<sub>OXA-23</sub>. While there were no patient  
232 infections or colonization by *S. maltophilia* or *E. miricola* at the sampled MICU during the  
233 sampling sessions, these species have previously been reported to develop multi-drug resistance  
234 and be associated with nosocomial and community-acquired infections. Specifically, *S.*  
235 *maltophilia* is associated with respiratory infections<sup>41</sup>. *E. miricola* has been reported to associate  
236 with a variety of infections including bacteremia, pulmonary abscess, urinary tract infection,  
237 catheter-associated bacteremia in a hemodialysis patient, and a fatal intracranial infection<sup>42-49</sup>.  
238 *Elizabethkingia* has also been implicated in healthcare-associated outbreaks of the built  
239 healthcare environment<sup>50</sup>. *P. aeruginosa* can cause pneumonia and bacteremia, along with  
240 urinary tract and wound infections<sup>51</sup>. It is one of the three species ranked first priority on the  
241 World Health Organization (WHO) list of antibiotic-resistant bacteria<sup>52</sup> and a pathogen of major  
242 concern for nosocomial infections<sup>53</sup>. Although rare, *A. radioresistens* can cause infections in the  
243 lungs, blood, wounds, or urinary tracts, particularly in hospital settings<sup>54-57</sup>. More importantly, it  
244 has been identified as a potential disseminator of ARGs, transferring the *bla*<sub>OXA-23</sub> gene to  
245 *Acinetobacter baumannii*<sup>58</sup>, another first-priority pathogen on the WHO list.

246 Moreover, we identified five genomically different isolates belonging to novel species according  
247 to multiple identification algorithms (KmerFinder, PhyloPhlAn, autoMLST, and MiGA), all of  
248 which were recovered from sink drains and three of which are potential pathogens (β-hemolysis  
249 on blood agar<sup>40</sup>) harboring multiple copies of multidrug-resistant ARGs. Three can be identified  
250 to genus level (*g\_Stenotrophomonas*, *g\_Achromobacter*, *g\_Cupriavidus*), while the other two  
251 can only be identified to family level (*f\_Rhizobiaceae*, *f\_Xanthomonadaceae*).

252 Interestingly, in this subgroup (63 out of 1415 isolates), we observed potential evidence of  
253 bacterial persistence and in situ evolution of opportunistic pathogens in sink drains, as well as

254 their potential dissemination across multiple MICU rooms. In both sampling events (February  
255 and July), we recovered the same strains ( $\text{ANI} \geq 99.99\%^{59,60}$ ) of *P. aeruginosa* and *S.*  
256 *maltophilia* from the same sink drains across three patient rooms (PT\_3, PT\_4, PT\_8, Fig. 3a).  
257 Observation of the same strain in the same location at two time points suggests that it persisted in  
258 sink drains over the course of half a year. Notably, the original *P. aeruginosa* isolate and one of  
259 the subsequent isolates carried type-1 *qacEdelta1*-carrying plasmids and exhibited high CHG  
260 MICs (128  $\mu\text{g/mL}$ , above *P. aeruginosa*'s epidemiological breakpoint 50  $\mu\text{g/mL}$ , Fig. 6, Table  
261 S1). However, a second subsequent isolate, while still meeting the identity threshold for  
262 belonging to the same strain, did not contain the *qacEdelta1* gene and had an MIC of 32  $\mu\text{g/mL}$ .  
263 This observation suggests that the ARG-carrying plasmid can be lost, potentially under reduced  
264 selective pressure, and that carrying *qacEdelta1* may associate with CHG resistance in *P.*  
265 *aeruginosa* (Table S1). For *S. maltophilia*, we observed signs of increased CHG tolerance and  
266 intra-species/inter-strain competition during the persistence. In the PT\_3 sink drain, the MIC of  
267 two intra-strain isolates increased from 16 to 64  $\mu\text{g/mL}$  between the first and second sampling  
268 events. In the PT\_8 sink drain, we identified two inter-strain isolates with MICs of 4  $\mu\text{g/mL}$   
269 (S60) and 32  $\mu\text{g/mL}$  (S10) during the first sampling event, and one isolate with an MIC of 64  
270  $\mu\text{g/mL}$ , belonging to the same strain as S10, during the second event. Furthermore, in sink drains  
271 of multiple rooms, we detected the same strains of *E. miricola* (MD\_3 and PT\_10, PT\_2 and  
272 PT\_7) and *S. maltophilia* (PT\_7 and PT\_8) as well as the same species of *P. aeruginosa* and  
273 *Delftia tsuruhatensis* (Fig. 3b, Fig. S7). Additionally, we found that *S. maltophilia* and *P.*  
274 *aeruginosa* cohabitated the same sink drain in two patient rooms (PT\_5, PT\_7). These organisms  
275 can be co-colonizers in the respiratory tract of cystic fibrosis patients<sup>41</sup>, indicating the possibility  
276 of contracting both pathogens from the same environmental location<sup>61</sup>. It should be noted that  
277 these findings are based on a limited number of isolates due to a tradeoff with taxa breadth.  
278 Nevertheless, they offer guidance for future studies with larger sample sizes, potentially focusing  
279 on specific species.

280 Of the 37 high-CHG MIC isolates in the cultivation dataset, 19 were sequenced. Among these,  
281 we found three *S. maltophilia*, two *P. aeruginosa*, seven *E. miricola*, two *Cupriavidus*  
282 *metallidurans*, and two *D. tsuruhatensis* isolates. The remaining three isolates had ambiguous  
283 species assignments possibly belonging to *D. tsuruhatensis*, *Delftia acidovorans*, or *S.*  
284 *maltophilia*. While *S. maltophilia*, *P. aeruginosa*, and *E. miricola* are more often recognized in  
285 clinical cultures, *C. metallidurans*, *D. tsuruhatensis*, and *D. acidovorans* are gaining attention as  
286 emerging opportunistic pathogens<sup>62-67</sup>.



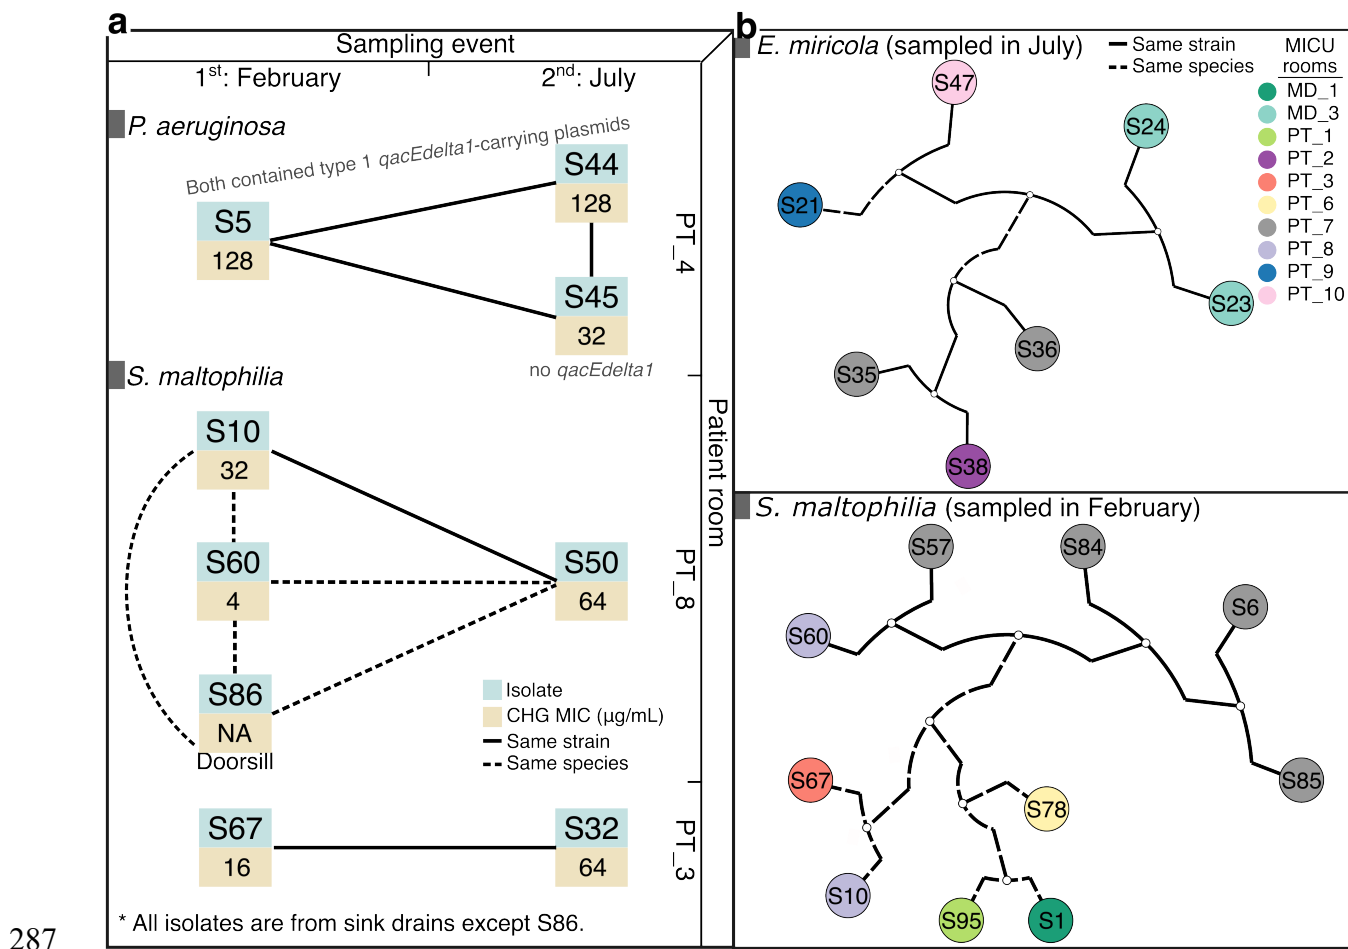

287  
288 **Fig. 3 Indications of a) bacterial persistence and in situ evolution of opportunistic**  
289 **pathogens in sink drains, as well as b) their potential dissemination across multiple MICU**  
290 **rooms.** Patient rooms were deidentified. See Fig. S7 for additional species with multiple isolates  
291 detected in several MICU rooms during the same sampling event.

292 **Molecular mechanisms conferring chlorhexidine resistance are heterogeneous and**  
293 **remain largely undiscovered**

294 Across high-CHG-MIC species, antibiotic efflux was the most prevalent and abundant identified  
295 resistance mechanism (Fig. 4a). *P. aeruginosa* harbored a significantly greater quantity and  
296 variety of ARGs than other species. However, while *C. metallidurans* harbored fewer ARGs,  
297 most of its ARGs were mobile (6 out of 8 on average). ARG profiles of high-CHG-MIC species  
298 demonstrated heterogeneity both within and across species (Fig. 4b-c). We detected several  
299 ARGs falling into Q1 of the health risk index ranking<sup>68</sup> in  $\geq 2$  species (out of 7), including *sme*  
300 family, *sull*, and *adeF*. Particularly, *adeF* was present in all high-CHG-MIC isolates except *P.*  
301 *aeruginosa*.

302 Although many ARGs were identified, only two known to reduce susceptibility to CHG,  
303 *qacEdelta1*<sup>69-71</sup> and *norA*<sup>72-75</sup>, were observed in 63 sequenced isolates (Table S4). Among the  
304 high-CHG-MIC isolates, only *qacEdelta1* was detected, and this was limited to four out of 19  
305 such isolates belonging to two species (*C. metallidurans* and *P. aeruginosa*, Fig. 4b-c). In  
306 addition, two *Acinetobacter radioresistens* isolates sharing the same ARG profile exhibited  $\geq$  16-  
307 fold CHG MICs difference (Fig. 5c). These, in combination, indicate that novel ARGs or  
308 pathways conferring CHG resistance remain to be discovered.

309

310

311

312

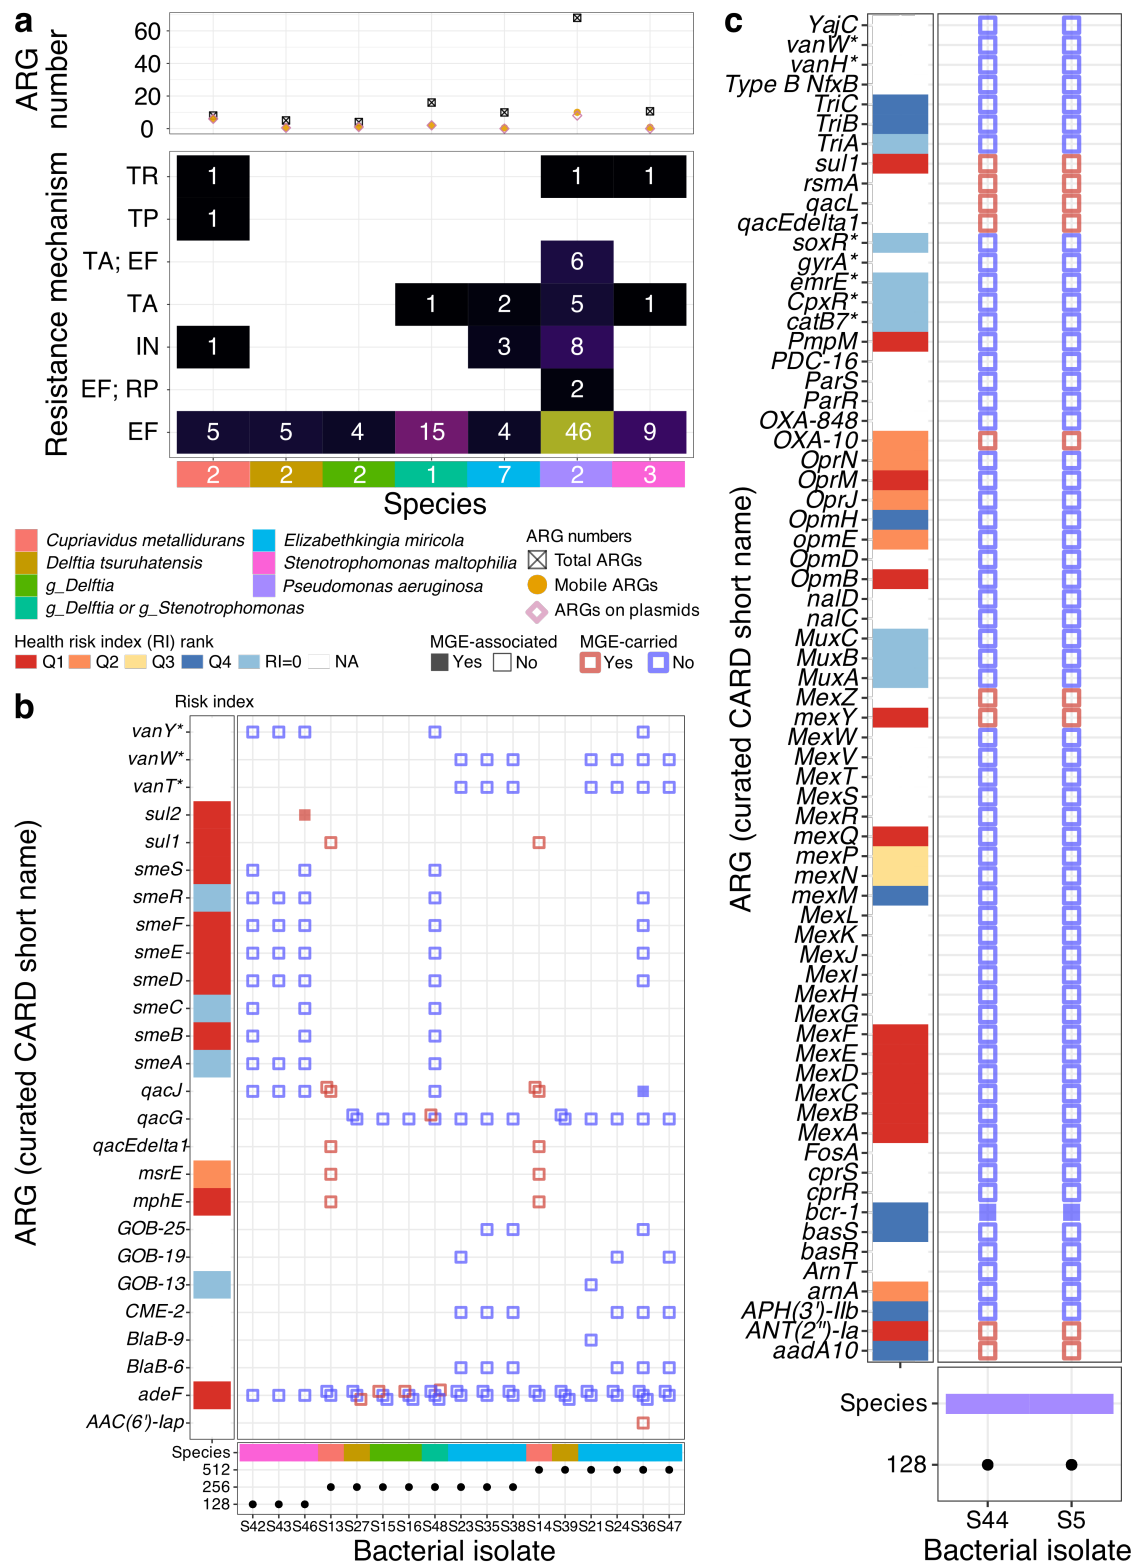

313

314 **Fig. 4 Antibiotic resistance mechanism and gene profiles of the sequenced high-CHG-MIC**  
 315 **isolates (MICs  $\geq 128 \mu\text{g/mL}$ ). a) Distribution of antibiotic resistance mechanisms and genes**

316 across different species. ARG numbers: Error bars represent the mean standard error. Resistance  
317 mechanisms: Numbers in the main heatmap represent the average ARG counts for each  
318 mechanism; those in the marginal heat blocks indicate the number of high-CHG-MIC isolates  
319 per species. Antibiotic resistance gene profiles of high-CHG-MIC isolates: **b)** all species except  
320 *Pseudomonas aeruginosa*, **c)** *Pseudomonas aeruginosa*. Each square in the dot plots represents  
321 one ARG copy. ARGs were named according to the curated CARD short names (output of  
322 Resistance Gene Identifier, Methods)<sup>76</sup>. ARGs located within MGEs were classified as MGE-  
323 carried; those situated within a 5 kb proximity to an MGE were considered MGE-associated;  
324 both were deemed mobile. Health risk index ranks from Zhang et al. were used to prioritize  
325 ARGs<sup>68</sup>. Abbreviations: **a)** EF: efflux, IN: inactivation, RP: reduced permeability, TR: target  
326 replacement, TP: target protection, TA: target alteration; **b)** *vanY\**: *vanY* gene in *vanM* cluster,  
327 *vanW\**: *vanW* gene in *vanG* cluster, *vanT\**: *vanT* gene in *vanG* cluster; **c)** *vanH\**: *vanH* gene in  
328 *vanB* cluster, *gyrA\**: *Pseudomonas aeruginosa gyrA* conferring resistance to fluoroquinolones,  
329 *emrE\**: *Pseudomonas aeruginosa emrE*, *CpxR\**: *Pseudomonas aeruginosa CpxR*, *catB7\**:  
330 *Pseudomonas aeruginosa catB7*, *soxR\**: *Pseudomonas aeruginosa soxR*; **legend)** *g\_Delftia*:  
331 ambiguous species *Delftia tsuruhatensis* or *Delftia acidovorans*, *g\_Delftia* or  
332 *g\_Stenotrophomonas*: ambiguous species *Delftia tsuruhatensis*, *Delftia acidovorans* or  
333 *Stenotrophomonas maltophilia*.

334  
335 To further investigate the genetic characteristics of clinically important bacteria regarding CHG  
336 tolerance, we examined the presence, types, and differential abundances of ARGs and mobile  
337 ARGs with varied CHG MICs in *S. maltophilia*, *E. miricola*, *A. radioresistens*, and *P.*  
338 *aeruginosa* (Fig. 5). Among these species, *P. aeruginosa* was the only one found to carry a  
339 known CHG-ARG, *qacEdelta1*, which was present in three out of the six isolates. Specifically,  
340 two isolates had MICs of 128 µg/mL and one had an MIC of 32 µg/mL. In all cases, the gene  
341 was located on a plasmid, indicating potential for horizontal gene transfer. Although no known  
342 CHG ARG was predicted in the other two species, upon qualitative inspection, we identified  
343 ARGs potentially associated with CHG tolerance. These included *sul2*, *smeA/B/C/S* for *S.*  
344 *maltophilia*, and *smeD/E/F/R*, *qacJ*, *AAC(6')-Iap* for *E. miricola*. Future research could  
345 interrogate these gene candidates, especially the Q1 health risk ARGs<sup>68</sup> *sul2* and *smeB/D/E/F/S*,  
346 by employing more quantitative and systematic surveys along with experimental validations. The  
347 taxon *E. miricola* may be associated with high CHG MICs, as all isolates exhibited MICs of 256  
348 µg/mL or higher. Particularly, isolate S36 had an MIC of 512 µg/mL. Compared to other *E.*  
349 *miricola* isolates, it contained more types and quantities of ARGs, and more critically two unique  
350 mobile ARGs (*qacJ* and *AAC(6')-Iap*). *P. aeruginosa* exhibited significantly higher quantities of  
351 ARGs and mobile ARGs compared to most species in the dataset (Table S4) and consistently  
352 ranked in the top three for all three indices. Notably, several isolates warrant further attention:  
353 isolate S30, with an ambiguous species assignment between *Citrobacter amalonaticus* and  
354 *Citrobacter freundii*; S25, belonging to a novel species of genus *Cupriavidus*; and S13 and S14,  
355 identified as *Cupriavidus metallidurans*, all contained a high number of ARGs or mobile ARGs.  
356 However, we could not establish statistical correlations between CHG MICs and the quantities of



368 *vanH*\*: *vanH* in *vanO* cluster; **b)** *vanW*\*: *vanW* gene in *vanG* cluster, *vanT*\*: *vanT* gene in *vanG*  
369 cluster.

### 370 ***qacEdelta1*-carrying multidrug-resistant plasmids are a potential concern**

371 *qacEdelta1* was detected exclusively on plasmids in six isolates (Fig. 6, Table S5). Each isolate  
372 harbored one *qacEdelta1*-carrying plasmid. All isolates were recovered from sink drains, with  
373 S30 originating from a staff-only restroom and the remaining coming from patient rooms.  
374 Notably, all six *qacEdelta1*-carrying plasmid scaffolds had  $\geq 3$  ARGs regardless of species, five  
375 of which carried the highest number of ARGs among all plasmid scaffolds in the sequenced  
376 isolates (six ARGs in one plasmid scaffold). Another notable feature shared by these plasmids  
377 was the colocalization of *qacEdelta1* and *sull*, arrayed next to each other as a cassette.  
378 Importantly, *sull*, a Q1 health risk ARG, confers resistance to sulfonamide antibiotics and its  
379 proximity to *qacEdelta1* merits attention.

380 The *qacEdelta1*-carrying plasmid scaffolds could be classified into four types according to blastn  
381 alignments<sup>77</sup>, and type-1 and type-3 plasmid scaffolds were possibly associated with high CHG  
382 tolerance. Type 1 contained two identical plasmid scaffolds in two isolates of the same *P.*  
383 *aeruginosa* strain (S5, S44). Type 2 comprised a plasmid scaffold from another *P. aeruginosa*  
384 strain (S37) that was closely related to type 1 with 8 bases unaligned. Type 3 was composed of  
385 the other two identical plasmid scaffolds in two isolates of the same *C. metallidurans* strain (S13,  
386 S14). Type 4 held a different plasmid scaffold in an isolate with an ambiguous species  
387 assignment between *Citrobacter amalonaticus* and *Citrobacter freundii* (S30) which shared  
388 common regions with the other plasmids. It is worth highlighting that the top BLAST hits for  
389 type-1 plasmid scaffolds (query coverage: 100%, identity  $\geq 99.99\%$ , database: nr/nt) matched  
390 two plasmids from clinical *P. aeruginosa* strains - one from a bloodstream infection and the  
391 other from sputum - both collected in Chicago (Table S5). While the two type-1 plasmid  
392 scaffolds shared an identical sequence alignment in the two *P. aeruginosa* strain-matched  
393 isolates, S5 and S44, they were positioned in opposite directions and were not the most closely  
394 related phylogenetically (Fig. 6). This suggests that carriage of this ARG cassette is dynamic and  
395 large-scale genomic changes like inversions might occur. Nevertheless, they still manifest the  
396 same MIC (128  $\mu\text{g}/\text{mL}$ ), indicating that the inversion did not disrupt the function of CHG  
397 tolerance. Notably, the strain of S5 and S44 probably persisted in sink drains over half a year  
398 (Fig. 3a). In comparison, plasmid scaffolds of S5 - S30 and S44 - S37 were more closely related,  
399 respectively. S44 and S37 were two different strains of *P. aeruginosa*, while S5 and S30  
400 belonged to different orders. This suggests that the *qacEdelta1*-carrying plasmid could be  
401 transferred in situ not only between environmental bacteria of the same species but also between  
402 those that are more evolutionarily distant.



403 To the best of our knowledge, this study is the first to report the presence of the *qacEdelta1* gene  
 404 on a plasmid in *C. metallidurans*. *C. metallidurans* was traditionally considered non-pathogenic  
 405 until recent case reports suggested otherwise. In 2005, this bacterium was identified in the  
 406 respiratory secretions of cystic fibrosis patients, though its pathogenic effects were not  
 407 understood at the time<sup>78</sup>. In 2011, a case of invasive nosocomial septicemia caused by *C.*  
 408 *metallidurans* was reported following surgery<sup>62</sup>. Furthermore, in 2015, four cases of catheter-  
 409 related bacteremia due to this bacterium were documented<sup>79</sup>. The growing clinical importance,  
 410 combined with its detection in MICU patient room environments, high CHG tolerance, and  
 411 carriage of a concerning plasmid, implicate the need for further investigations.

412

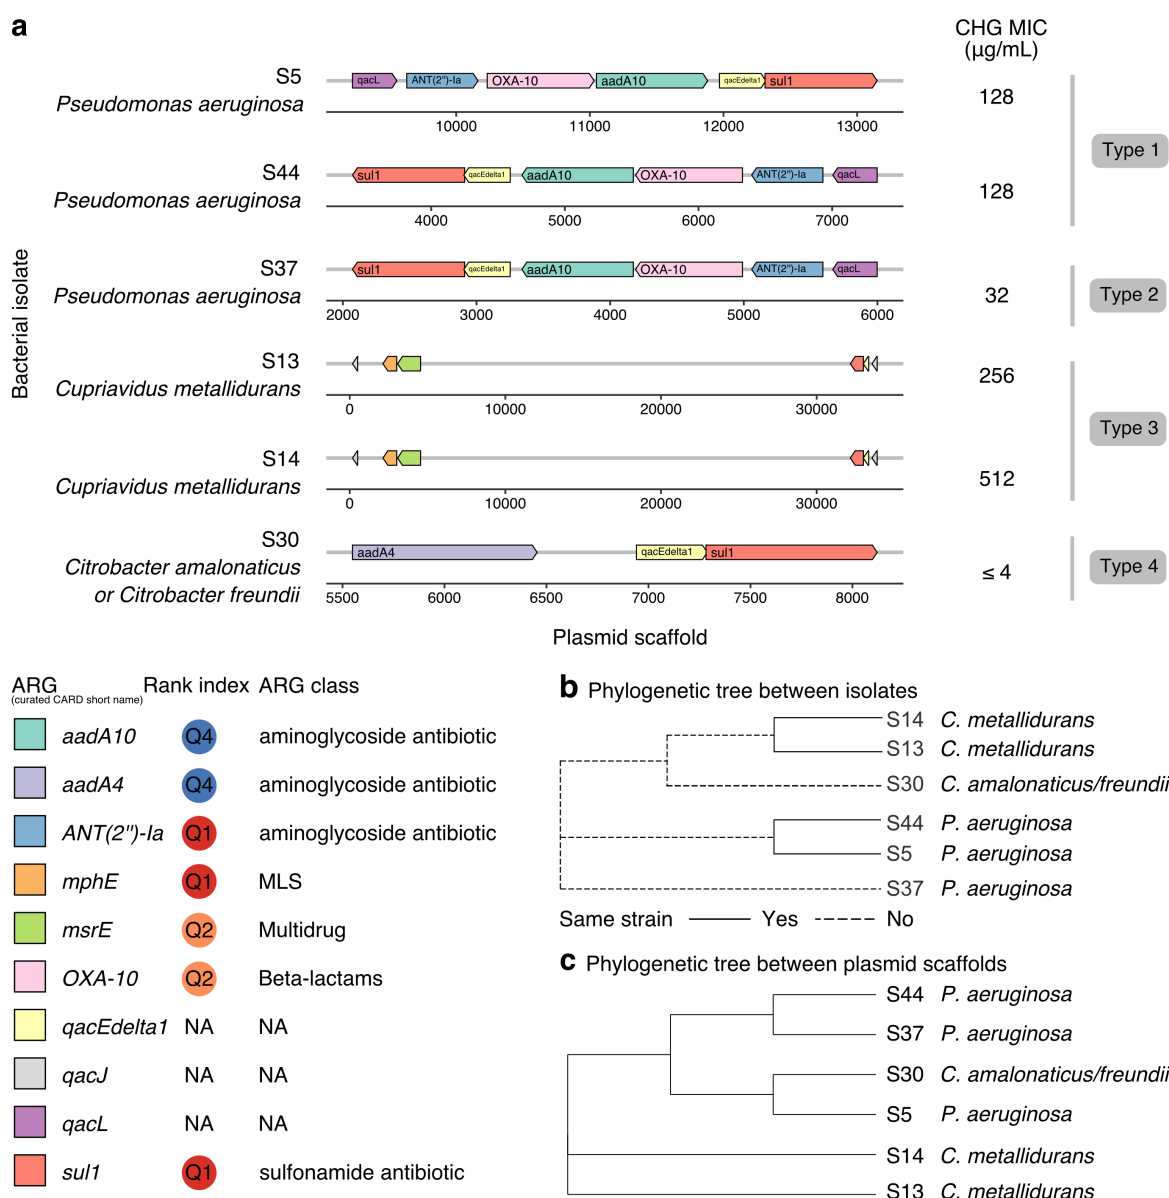

413

414 **Fig. 6 *qacEdelta1*-carrying multidrug-resistant plasmids are of potential concern,**  
415 **particularly type-1 and type-3 plasmid scaffolds, which are possibly associated with high**  
416 **CHG tolerance. a)** Colocalization of ARGs on the plasmid scaffolds. **b)** Phylogenetic  
417 relationship between the isolates. **c)** Phylogenetic relationship between the plasmid scaffolds. All  
418 isolates were recovered from sink drains. S30 was from a staff-only restroom, and the other  
419 isolates were from patient rooms. See Table S5 for more information. ARGs were named  
420 according to the curated CARD short names (output of Resistance Gene Identifier, Methods)<sup>76</sup>.  
421 Health risk index ranks from Zhang et al. were used to prioritize ARGs<sup>68</sup>. MLS: macrolides,  
422 lincosamides and streptogramins.

## 423 Discussion

424 Although CHG is used primarily on patient skin, it could be transferred to hospital environments.  
425 Once there, CHG likely persists on indoor surfaces despite surface cleaning and disinfection,  
426 with its concentration decreasing to sublethal levels for some clinically relevant bacteria, as  
427 demonstrated by our microcosm experiments. This finding was further corroborated by an in-situ  
428 field survey, which revealed widespread CHG tolerance in MICU environments. Notably, we  
429 emphasized sink drains as critical hotspots, corroborating previous findings. Further, based on  
430 the isolation of CHG-tolerant bacteria from doorsills, we urge more attention to indoor air as  
431 transport mechanisms for resistant organisms. We observed potential evidence of bacterial  
432 persistence, increased tolerance, and in-situ evolution of opportunistic pathogens in sink drains,  
433 as well as dissemination across multiple MICU rooms. *S. maltophilia*, *E. miricola*, and *P.*  
434 *aeruginosa* were highly represented species in the sequenced subset. Through our broad-scope  
435 study, we found that the molecular mechanisms conferring chlorhexidine resistance were  
436 heterogeneous and largely undiscovered. Nevertheless, we identified ARG candidates that  
437 warrant future investigation, particularly two types of *qacEdelta1*-carrying, plasmid-borne  
438 multidrug-resistant cassettes. These cassettes are potentially concerning for their role in pathogen  
439 persistence, the development and dissemination of CHG resistance, and broader antibiotic  
440 resistance.

441 The ways in which humans interact with their environment, including touch and cleaning, along  
442 with characteristics like surface material, jointly impact the fate of chemicals applied to humans.  
443 Subsequently, these factors influence the trajectory of microbial ecology and evolution and in  
444 return affect our exposome<sup>80</sup>. We identified sink drains and air as environmental hotspots for  
445 CHG tolerance and opportunistic pathogens. Consistent with previous observations<sup>81-83</sup>, sink  
446 drains were confirmed as critical reservoirs. CHG-tolerant and/or opportunistic bacteria hosted in  
447 sink drains, likely within biofilms, could persist for at least half a year, adaptively evolving and  
448 increasing their CHG tolerance, and potentially disseminating<sup>84</sup>. We hypothesize that water  
449 availability plays an important role, driving the in-situ microbial survival and persistence as well  
450 as antimicrobial adaptation and evolution in the built environment (e.g., sink drains). It may exert

451 a stronger impact than other factors such as touch frequency and surface material<sup>185,86</sup>. Building  
452 on previous evidence that microbes can be transmitted from sinks to patients<sup>61</sup>, our findings  
453 further emphasize the importance of sinks as possible sources of healthcare-associated infections  
454 and antimicrobial resistance, supporting the waterless ICU initiative<sup>87</sup>.

455 Since biomass on doorsills reflects what is circulating in the air<sup>88-90</sup>, indoor air was identified as  
456 another hotspot, particularly for its role as a transport mechanism for resistant organisms. Unlike  
457 in sink drains, where water potentially supports bacterial metabolism and growth, bacteria in dry  
458 environments (e.g., doorsills) are more likely dormant<sup>80</sup>. Thus, we hypothesize that these bacteria  
459 are transferred to such environments and remain in the same state as when they were on human  
460 bodies. For example, bacteria detected on doorsills, including *A. radioresistens*, *S. maltophilia*,  
461 and *E. hormaechei*, may be carried on air currents and settle there along with biological debris  
462 (e.g., skin squames) shed by humans. Previous studies have implicated this phenomenon for *S.*  
463 *aureus*<sup>91,92</sup>. It is possible that settled bacteria could be re-suspended into the air and potentially  
464 infect patients. Although high-touch surfaces yielded fewer CHG-tolerant isolates compared to  
465 sink drains and air, they still hold value for monitoring due to frequent interactions. Note that the  
466 roles of environmental locations are dynamic within this interaction model, shifting as conditions  
467 and time change. For example, sink drains act as reservoirs when they receive inputs from hands,  
468 incoming water, and air, hosting microbes in biofilms. They can become sources of exposure  
469 when microbes are re-aerosolized<sup>61</sup>, or serve as transport mediums when contaminants flow  
470 through them to wastewater treatment plants. Similarly, the two hypotheses are also dynamic and  
471 condition-dependent.

472 Detection of CHG-tolerant, ARG-carrying, and/or opportunistic bacteria in environments does  
473 not necessarily translate to elevated risk of infection and antibiotic resistance due to several  
474 challenges and knowledge gaps<sup>93,94</sup>. First, more studies are needed to clarify the relationship  
475 between carrying ARGs and manifesting resistance phenotypes or increased tolerance. For  
476 instance, while *qacEdelta1* was a shared ARG in some high-CHG-MIC isolates (Fig. 4b-c), its  
477 presence was not exclusive to these, as it was also identified in two isolates with relatively low  
478 MICs (*P. aeruginosa*: 32 µg/mL, below its epidemiological cut-off value 50 µg/mL<sup>12</sup>; genus  
479 *Citrobacter*: ≤ 4 µg/mL; Table S4). In contrast, carrying *norA* (the other known CHG ARG) in  
480 *Staphylococcus epidermidis* appeared to associate with reduced susceptibility<sup>25</sup>. The *norA*-  
481 carrying isolate from our cohort showed an MIC of 4 µg/mL. Compared with previous reports<sup>95</sup>,  
482 this was 4.3 times higher than that observed in 33 blood isolates from 1965-1966, 2.1 times that  
483 of 290 more recent clinical isolates (post-2002), and comparable to that in four isolates from  
484 infected joint replacements. Future studies should aim to extend these qualitative phenomena  
485 observed in a limited sample size to quantitative analyses.

486 In addition to these ARGs previously reported to associate with CHG tolerance, we demonstrated  
487 from various angles that novel resistance mechanisms await discovery, and identified ARG and  
488 plasmid candidates (i.e., type-1 and type-3 *qacEdelta1*-carrying multidrug-resistant plasmids).  
489 Despite the richness of available data resources, we were challenged by the poor representation  
490 of environmental bacteria in current databases. For example, when searching the BLAST  
491 database for our *qacEdelta1*-carrying plasmid scaffolds, we found two top hits for *P. aeruginosa*  
492 with 100% query coverage. However, the maximum query coverage was only 46% for  
493 *Citrobacter spp.* and 20% for *C. metallidurans*. Expanding these databases and performing *de*  
494 *novo* gene annotations as complementary approaches would be beneficial in the future. To  
495 further connect carriage of ARGs to resistance phenotypes, future investigations should  
496 interrogate these candidates using functional metagenomics<sup>96</sup>, knockouts or cloning, as well as  
497 assess cross-resistance to medically relevant antibiotics via susceptibility tests (e.g., MIC  
498 assays).

499 Second, the clinical importance of detecting biocide resistance phenotypes in laboratories (e.g.,  
500 using MIC assays) is not sufficiently understood and lacks consensus. The clinical relevance  
501 includes both disinfection efficacy and the evolution of cross-resistance to antibiotics,  
502 particularly in opportunistic pathogens. Several terms - resistance, tolerance, and reduced  
503 susceptibility - are used ambiguously in the field to describe these phenotypes, but their  
504 definitions and applications are not well standardized. Moreover, there is ongoing debate over  
505 whether MIC is the appropriate metric for assessing biocide efficacy<sup>97</sup>. MIC, which was  
506 originally developed for antibiotics, measures the ability of a compound to inhibit bacterial  
507 growth over 16-24 hours, whereas biocides are often applied at high concentrations for brief  
508 periods during skin antiseptics or environmental disinfection. Special cases exist, such as CHG  
509 bathing, where we seek both immediate antiseptic effects and longer-term benefits from residual  
510 CHG on the skin for up to 24 hours. To address some of these ambiguities, studies have  
511 proposed new frameworks<sup>98</sup> and metrics (e.g., the minimum duration for killing) to complement  
512 MIC. However, these alternatives lack sufficient benchmarking and evaluation of  
513 generalizability. As surveillance expands, generalizability becomes increasingly important - a  
514 limitation the current gold standard, MIC, also faces. For example, clinical breakpoints for  
515 chlorhexidine, as with many other antimicrobials, have not yet been established<sup>27</sup>. Reaching  
516 consensus on clinical breakpoints and even epidemiological cut-offs is challenging. For instance,  
517 we used 18.75 µg/mL as the cut-off for CHG tolerance, as it was indicated as a threshold CHG  
518 skin concentration<sup>3</sup>; however, a recent study has shown disagreement<sup>99</sup>. Nonetheless, CHG  
519 concentrations used in clinical applications on skin and mucosal surfaces are much higher than  
520 the highest MICs identified in our environmental isolates.

521 Large-scale environmental surveillance introduces additional challenges. During MIC assays,  
522 despite following the CLSI standards<sup>100</sup> as closely as possible, we could not confirm that all  
523 inocula were standardized to 10<sup>4</sup> CFU per 5- to 8-mm diameter spot (Methods) because the  
524 taxonomy and growth characteristics of isolates were unknown at the time of testing.  
525 Furthermore, it remains unclear whether the standard CFU threshold has the same clinical  
526 relevance for environmental isolates as it does for clinical isolates, which were used to develop  
527 the standard. The limitations of MIC extend beyond the lab. In environmental settings, microbes  
528 rarely exist in isolation or as free-living cells; rather, they often form biofilms within complex  
529 communities where synergistic/competitive interactions and physical protection may occur. As a  
530 result, assays that simulate their in-situ states may offer more accurate insights. Alternative  
531 approaches, such as examining contact times necessary to achieve a reduction threshold<sup>97</sup> or  
532 using microcosm experiments, like those employed in our study, may provide better  
533 approximations of real-world conditions. For instance, we examined bacterial survival following  
534 24-h CHG exposure on surface coupons (Fig. 1c), which better approximates in-situ conditions  
535 than liquid media assays. However, this approach requires optimization. To ensure technical  
536 feasibility, we used a higher starting bacterial density than is typically found on uncontaminated  
537 hospital surfaces. This version simulates a scenario where residual CHG is present on a surface,  
538 and a high burden of pathogens is introduced (e.g., through sneezing). More research is needed  
539 to develop consensus methods that are applicable to real-world scenarios.

540 Furthermore, researchers should be more explicit when communicating findings. For example,  
541 while chlorhexidine digluconate is the most used formula, other forms, such as chlorhexidine  
542 acetate, exist. We have encountered instances where the type of formula was not explicitly  
543 reported in the literature, hindering normalized evaluations through reviews and meta-  
544 analyses<sup>101</sup>.

545 Despite these challenges, we conducted surveillance of CHG tolerance in built-environment  
546 isolates, a practice less common than in clinical and animal isolates. The MICs of environmental  
547 isolates are generally considered lower (Table S6)<sup>16,17,19,22-24,102,103</sup>. However, bacteria isolated in  
548 our study, especially those from sinks, exhibited CHG MICs at the high end of the reported  
549 spectrum<sup>12,15,27,101,104-108</sup>. Although further investigation is needed to determine whether our  
550 isolates represent a statistically significant increase in tolerance, the results suggest that the  
551 MICU environment harbors CHG-tolerant microbes, raising a potential warning sign.

552 Moving forward, we should further scrutinize the environmental hotspots (e.g., sink drains, air)  
553 and establish models to quantify the complex human-environment and chemical-microbe  
554 interplay. First, combining broad-scope studies with more focused, larger-sized studies is  
555 recommended. We should collect denser longitudinal samples and richer metadata; for example,

556 a logical next step would be to survey chlorhexidine concentrations in MICUs. Second, profiling  
557 these samples using multimodal approaches, such as combining multi-omic sequencing of  
558 communities with whole-genome sequencing of isolates, could provide deeper insights. Third,  
559 pairing environmental and human microbiota could uncover more nuanced connections.  
560 Furthermore, as our understanding in MICUs advances, studies could be expanded to other  
561 buildings (e.g., entire hospitals, veterinary facilities, homes, athletic facilities) to determine  
562 whether findings surrounding CHG tolerance are unique to MICUs, hospitals, or built  
563 environments in general.

564 In summary, by combining microcosm experiments with field surveys, we provided a  
565 comprehensive depiction of CHG tolerance in MICU environments, connecting chemical,  
566 microbial, and molecular perspectives. Understanding these interactions could reveal potential  
567 intervention opportunities for infection prevention and lead to actionable recommendations for  
568 regulations and healthcare policy. Given the critical value of CHG in healthcare and the dearth of  
569 viable alternatives, proactive measures are important, such as integrating environmental  
570 management with clinical interventions, expanding stewardship programs, and exploring  
571 alternatives to CHG. Furthermore, due to chlorhexidine's versatile applications, the insights  
572 gained from this study could benefit a broader audience, informing stewardship practices in  
573 veterinary hospitals and other built environments, as well as guiding consumer use of antiseptics  
574 and disinfectants.

## 575 **Methods**

### 576 **Chlorhexidine persistence on surfaces**

577 We investigated the chlorhexidine persistence on three surface materials commonly found in  
578 hospital (laminated wood, plastic [high-density polyethylene; HDPE], metal [stainless steel]) in  
579 response to six different cleaning practices used commonly on inanimate hospital surfaces (no  
580 cleaning, clean with water, disinfect with ethanol, bleach, peracetic acid, or benzalkonium  
581 chloride) (Fig. S1).

### 582 **Microcosm setup**

583 Each surface was cut into 4"×8" coupons, and each coupon was divided into 1"×1" sections by  
584 drawing markers. The coupons were UV sterilized for 15 minutes before applying 2%  
585 chlorhexidine digluconate (CHG, IUPAC name: (1E)-2-[6-[[amino-[(E)-[amino-(4-  
586 chloroanilino)methylidene]amino]methylidene]amino]hexyl]-1-[amino-(4-  
587 chloroanilino)methylidene]guanidine;(2R,3S,4R,5R)-2,3,4,5,6-pentahydroxyhexanoic acid)  
588 solution (w/v, Sigma-Aldrich, St. Louis, MO, USA). The concentration 2% was selected to  
589 represent commercial CHG wipes used in patient bathing<sup>109,110</sup>. We first folded a Kimwipe



590 (Kimberly-Clark, Irving, TX, USA) in half three times to get a square about 2”×2” and 8 layers  
591 thick. We then pipetted 1 mL CHG onto the Kimwipe and wiped in a zigzag pattern along the  
592 long axis of the surface, such that the whole surface was covered after 5 passes. Wiping was  
593 repeated with a second Kimwipe from the opposite direction. Once the surface dried, an initial  
594 CHG measurement was taken in biological triplicate, representing 0 min. Each 1”×1” section  
595 was swabbed using a nonsterile cotton swab (Puritan, Guilford, ME, USA) premoistened in 0.8  
596 mL deionized water. The swabbing was conducted with consistent pressure and speed in two  
597 directions (up and down, left and right) for 15 s total. The swab was then stored in the deionized  
598 water for extraction and CHG concentration measurement.

599 Simulated cleaning practices were applied to CHG-treated surfaces using the same wiping  
600 technique. A group of surfaces that were not wiped served as baseline controls. The wiping  
601 solutions included deionized water, 70% ethanol (Decon Laboratories, King of Prussia, PA,  
602 USA), 10% bleach (Clorox, Oakland, CA, USA), 0.2% peracetic acid (Sigma-Aldrich, St. Louis,  
603 MO, USA), and 0.26% benzalkonium chloride (MP Biomedicals, Santa Ana, CA, USA; C8-  
604 18)<sup>111</sup>. The CHG concentrations were measured in biological triplicate at 5 additional timepoints  
605 (10 min, 1 h, 3 h, 6 h, and 24 h) following the same method. We selected 24 h as an experimental  
606 cycle because in MICU, patients were bathed with CHG wipes on a daily basis. The coupons  
607 were kept in light-proof compartments when not being wiped or swabbed. This was repeated for  
608 each disinfectant and each surface for 8 trials, yielding 24 biological replicates in total.

### 609 **Swab extraction and CHG concentration measurement**

610 CHG on swabs was extracted into water following an adaptation of CDC’s Swab Extraction  
611 Method<sup>94,112,113</sup>. The Falcon tube was vortexed at maximum speed for 1 min and shaken at 180  
612 rpm and 25 °C for 10 min, followed by careful squeezing against the tube wall and removal of  
613 the swab. CHG concentration was determined by a previously reported colorimetric assay with  
614 modifications<sup>3,114,115</sup>. We mixed 500 µL CHG solution with 500 µL  
615 hexadecyltrimethylammonium bromide (0.01 g/mL in deionized water, Sigma-Aldrich, St.  
616 Louis, MO, USA) and 200 µL sodium hypobromite (Aqua Solutions, Deer Park, TX, USA).  
617 Absorbance of the mixture was measured at 262 nm using a spectrophotometer (UV-2450,  
618 Shimadzu, Kyoto, Japan).

### 619 **Quantification of CHG recovery rates from surfaces and application efficiency to surfaces**

620 We examined the CHG recovery rates from different surface materials using the same swabbing  
621 technique and accounted for these rates in calculating the CHG concentration on surfaces (Table  
622 S7). After UV sterilization, we pipetted 100 µL 2% CHG onto a 1”×1” square for a total of 10  
623 replicates each surface type. Additionally, 100 µL 2% CHG was directly pipetted onto a swab to  
624 investigate the recovery rate of the swab extraction. When we directly applied CHG onto swabs,

625 85.46% was recovered in the measurement. For the tested surfaces, metal had a comparably high  
626 recovery rate (83.04%), indicating that almost all the CHG (97.16%) on a metal surface can be  
627 collected by swabbing. In contrast, plastic and laminate wood both retained CHG in sampling,  
628 with recovery rates of 69.79% and 55.58%, respectively.

629 CHG transfer rates from the Kimwipe to the surfaces in application was quantified afterwards  
630 (Table S8). Upon wiping a surface with a CHG wipe, we found that only 4-7% CHG on the wipe  
631 was transferred onto the surfaces. In comparison to the recovery rates from surfaces by swab  
632 sampling, the transfer rates showed an opposite trend across surface materials. While metal had  
633 the highest recovery rate in sampling, it captured the least CHG in application. Furthermore, the  
634 values were within the range of disinfectants released from ready-to-use Towelettes<sup>116</sup>, validating  
635 that our application technique mimics the usage of commercial disinfectants.

### 636 **Viability assay of bacterial isolates on CHG-contaminated surfaces**

637 We tested the survival of bacterial isolates on plastic surfaces after exposure to various  
638 concentrations of CHG for 24 h in biological triplicate. Four bacterial isolates (*Escherichia coli*  
639 [ATCC 25922], *Klebsiella pneumoniae* [ATCC 13883], *Klebsiella variicola* [20-20012]<sup>37</sup>, and  
640 *Staphylococcus aureus* [ATCC 29213]) were selected as model strains. Plastic was selected as a  
641 representative surface because it is a common material of equipment in the immediate vicinity of  
642 patients and healthcare workers (e.g., bedrail, nurse call button, keyboard, mouse). Five different  
643 CHG concentrations (31.00, 15.50, 3.10, 0.31, 0 [positive control]  $\mu\text{g}/\text{cm}^2$ ) were tested to cover  
644 the range of CHG persisting on surfaces under disinfection and cleaning.

645 To prepare bacterial inocula, the second passage of the stock culture were grown at 37°C to the  
646 late exponential phase and harvested at 3000 rpm for 1 min. The pellet was then resuspended in  
647 phosphate-buffered saline (PBS). The bacterial cell density in the inocula was determined by  
648 spread plating. To prepare surface coupons, HDPE plastic was cut into 2"×2" squares, UV  
649 sterilized for 15 min, and placed in a petri dish. CHG was applied to the center 1"×1" of the  
650 coupon by pipetting 100  $\mu\text{L}$  solution and spreading evenly with the pipette tip. Subsequently,  
651 100  $\mu\text{L}$  isolate suspension was applied using the same technique<sup>117</sup>. An additional coupon  
652 inoculated with 100  $\mu\text{L}$  PBS was included as the negative control. Surfaces were kept in dark at  
653 room temperature.

654 After 24 h, bacteria were sampled from surfaces and the surviving numbers were counted. Each  
655 surface was first dry swabbed for 5 s and wet swabbed twice for 7.5 s each time after rinsing in 1  
656 mL PBS. Finally, the swab was squeezed against the tube wall to expel any residual liquid<sup>117</sup>.  
657 Samples were diluted and 100  $\mu\text{L}$  of each dilution was spread plated onto TSA plates. The plates  
658 were incubated at 37°C for 24 hours to count the colonies.

## 659 **Field survey in a Medical Intensive Care Unit**

### 660 **Sample collection**

661 We collected 219 swab samples from seven different locations (e.g., bedrails, nurse call buttons,  
662 doorsills, keyboards, light switches, proximal sink drains; Table S3) in the MICU at Rush  
663 University Medical Center over two sampling events (February and July, 2018) (Fig. S2),  
664 including negative field controls and negative media controls. The MICU was selected because  
665 intensive care units are known to have high prevalence of antibiotic-resistant organism  
666 colonization and infection, and because patients in the MICU received daily skin cleansing with  
667 2% CHG-impregnated cloths (Sage 2% Chlorhexidine Gluconate Cloths, Stryker, Portage, MI,  
668 USA)<sup>118,119</sup>, which gives this environment a higher probability but also a lower threshold for  
669 acceptable risk of containing antibiotic-resistant and CHG-tolerant organisms. Sampling  
670 locations were selected to capture a variety of surfaces reflecting different ways in which people  
671 interact with the surface<sup>120</sup> and time-integrated aggregates of what was in the air (i.e.,  
672 doorsills)<sup>121</sup>. Sites were further selected to facilitate comparison with other hospital surveillance  
673 studies<sup>122</sup> and to keep a relatively balanced number of samples from each touch frequency group.  
674 Touch frequency categorization included bedrails and nurse call buttons as high-touch,  
675 keyboards as medium-touch, light switches as low-touch surfaces, and doorsills as no-touch.  
676 Sink drains were labeled as themselves. Touch frequency designations were based on interviews  
677 with healthcare professionals and prior evidence from the literature<sup>123-126</sup>.

678 Swabbing was conducted following CDC's Environmental Surface Sampling Swab Contact  
679 Method. Briefly, we used three sterile Nylon Flocked Dry Swabs (COPAN Diagnostics,  
680 Murrieta, CA, USA) premoistened with PBS to increase the recovery of biomass. Surfaces were  
681 swabbed in their entirety three times with consistent pressure and speed. Each time, we rotated  
682 the swabs and switched their order. Swabs were stored in 15 mL tubes with PBS and transferred  
683 to the lab on ice within 24 hours for immediate processing. Temperature, relative humidity,  
684 isolation level, and patient mobility for each patient room were recorded. The surface area of  
685 each sampling location was measured (Table S3).

### 686 **Swab extraction, sample cultivation, and initial screening**

687 Biomass on swabs was extracted into PBS following an adaptation of CDC's Swab Extraction  
688 Method<sup>94,112,113</sup>. Briefly, the Falcon tubes with swabs inside were vortexed at maximum speed  
689 for 10 s, shaken at 180 rpm and 25 °C for 10 min, and then vortexed again for 10 s, followed by  
690 careful squeezing against the side of the tube and removal of the swabs.

691 The samples were then subjected to cultivation and screening following a protocol modified  
692 from a previous study<sup>127</sup> (Fig. S3). Inocula were diluted to obtain between 30 and 300 colonies  
693 per plate. 100 µL of inoculum was spread plated on tryptic soy agar supplemented with 4 mg/L

694 itraconazole (TSAI) and incubated at 25°C for 4 days. When observable growth was detected,  
695 morphologies of colonies were characterized using standardized ontologies for streamlined  
696 analysis, and a representative number of colonies belonging to each morphology type were  
697 picked and stored in glycerol at -80°C. These plates were then replica plated onto blood agar and  
698 chlorhexidine agar plates for initial screening<sup>128</sup>. Chlorhexidine agar plates contained 10.56  
699 µg/mL chlorhexidine (equivalent to 18.75 µg/mL chlorhexidine digluconate, Sigma-Aldrich, St.  
700 Louis, MO, USA). *Staphylococcus aureus* ATCC 25923, *Staphylococcus epidermidis* ATCC  
701 12228, and *Pseudomonas putida* 56A10 (in-house ID)<sup>129</sup> were used as control strains in this  
702 chlorhexidine screening process. The chlorhexidine concentration was selected for initial  
703 tolerance screening because it was reported as the minimum effective concentration associated  
704 with significantly decreased colony counts of Gram-positive bacteria on the skin of patients who  
705 were bathed daily with CHG in the MICU. In addition, all the patient skin isolates recovered in  
706 the study had MICs below 18.75 µg/mL CHG<sup>3</sup>.

### 707 **Antimicrobial susceptibility testing**

708 We confirmed and refined chlorhexidine tolerance observed in the initial screen using a simplified  
709 agar dilution method adapted from the CLSI standard M07Ed11<sup>100</sup>. Briefly, agar dilution plates  
710 with different concentrations of CHG (0, 4, 8, 16, 32, 64, 128, 256, 512 µg/mL) were made with  
711 Mueller-Hinton Agar (MHA; Sigma-Aldrich, St. Louis, MO, USA) and chlorhexidine digluconate  
712 solution (20% w/v, Sigma-Aldrich, St. Louis, MO, USA). Each isolate was first inoculated from  
713 frozen stock in 100 µL TSB in a sterile 96-well clear round-bottom not-treated microplate (Corning,  
714 NY, USA) and incubated at 37 °C for 24 h, yielding F1. F1 was subcultured in 100 µL TSB with  
715 a 96-pin microplate replicator (transfers 1 µL inoculum each pin, Boekel Scientific, Feasterville-  
716 Trevoise, PA, USA) and incubated for another 24 h, yielding F2. F2 was inoculated onto surfaces  
717 of the agar dilution plates in biological triplicate with the 96-pin replicator, starting from the lowest  
718 concentration to the highest. MICs were determined after incubating the plates at 37 °C for 20 h.  
719 Negative controls and two quality control (QC) strains were included in every batch. The two QC  
720 strains were both MRSA with CHG MICs 1-2 and 8 µg/mL, respectively<sup>37</sup>.

### 721 **Genomic exploration of isolates recovered in the MICU**

#### 722 **Whole-genome sequencing**

723 A subset of 63 isolates were selected for whole-genome sequencing in two batches. Three  
724 negative controls were processed in parallel to samples throughout the entire pipeline, and all  
725 isolates were sequenced at 2×150 bp. The first batch was conducted by the Broad Institute using  
726 a fluorescent dye-based method on an Illumina HiSeq platform as previously described<sup>129</sup>. The  
727 second batch was performed at the NUSeq Core Facility at Northwestern University on an  
728 Illumina NovaSeq 6000 platform using an SP flow cell, and the sequencing library was prepared

729 using the Illumina Nextera XT DNA Sample Preparation Kit following the kit protocol. The  
730 average coverage depth was  $214.9\times$  ( $87.5\times \sim 536.5\times$ ) by estimation assuming 5 Mb for bacterial  
731 genome sizes.

### 732 **Genome assembly, taxonomic identification, and phylogenetic analysis**

733 The analysis pipeline was illustrated in Fig. S8. Raw reads were first quality checked by  
734 FastQC<sup>130</sup> (v0.11.5) and cleaned by fastp<sup>131</sup> (v0.23.2). Genomes were assembled using  
735 SPAdes<sup>132</sup> (v3.15.0) with the assembly quality assessed by CheckM<sup>133</sup> (v1.2.2) and QUAST<sup>134</sup>  
736 (v5.2.0). In the genome assembly, SPAdes parameters --careful and --isolate were compared and  
737 selected according to the quality of the resulted scaffolds. Integrating insights from the research  
738 community<sup>135</sup>, --careful was used for all samples except isolate S33. We then performed  
739 taxonomic assignments using KmerFinder<sup>136-138</sup> (v3.0.2) with the database version 20211017 and  
740 PhyloPhlAn<sup>139</sup> (v3.0.36) metagenomic SGBs with the database SGB.Jul20. Isolates with  
741 inconsistent assignments were further examined using autoMLST<sup>140</sup> *de novo* mode and MiGA  
742 TypeMat<sup>141</sup>. Phylogenetic trees among bacteria isolates were constructed with PhyloPhlAn  
743 (v3.0.36) on the low diversity setting using the assembled scaffolds. The strain-level relationship  
744 between isolates was determined using fastANI for ANI values  $\geq 99.99\%$ <sup>59,60</sup>. The phylogenetic  
745 tree among plasmid scaffolds (Fig. 6c) was constructed with Clustal Omega<sup>142</sup>.

### 746 **Analysis of antimicrobial resistance genes**

747 ARGs were predicted using Resistance Gene Identifier (RGI, v6.0.2) coupled with the  
748 Comprehensive Antibiotic Resistance Database (CARD, v3.2.7)<sup>76</sup>. Only ARGs under perfect and  
749 strict paradigms were included in the downstream analyses. ARGs presented in this study were  
750 named according to the curated CARD short names (i.e., Best\_Hit\_ARO output by RGI)<sup>76</sup>.  
751 Briefly, if the original gene name is less than 15 characters, the CARD short name is identical;  
752 otherwise, it has been abbreviated by CARD curators specifically to identify the proper gene or  
753 protein name. Mapping between a unique CARD short name and the corresponding metadata can  
754 be found in the CARD ontology database (<https://card.mcmaster.ca/>), including AMR gene  
755 families, drug classes, resistance mechanisms, resistomes, and homolog sequences. Mobile  
756 genetic elements were predicted using geNomad<sup>143</sup> (v1.5.2), MobileElementFinder<sup>144</sup>  
757 (mge\_finder v1.1.2, mgedb v1.1.1, blastn v2.14.0+), and VRprofile2<sup>145</sup> with default parameters.  
758 In MobileElementFinder outputs, putative composite transposons were excluded to avoid false-  
759 positive predictions. To infer the mobility of ARGs, they were classified as MGE-carried, MGE-  
760 associated, or MGE-unassociated according to their relative location to MGEs. Specifically,  
761 ARGs located within MGEs were classified as MGE-carried, whereas those situated within a 5  
762 kb proximity to an MGE were considered MGE-associated. Both MGE-carried and MGE-  
763 associated ARGs were deemed mobile<sup>68,146</sup>. To prioritize ARGs, health risk indices from Zhang  
764 et al. were employed, which they crafted by integrating factors of human accessibility, mobility,



765 pathogenicity and clinical availability<sup>68</sup>. To contextualize our findings within the framework of  
766 known CHG resistance mechanisms, we carried out a targeted review and curated a list of CHG  
767 ARGs, annotating each with a confidence level based on whether the evidence was correlational  
768 or causal (Table S9).

## 769 **Statistical analysis**

770 Statistical analyses and data visualization were conducted in R (v4.0.4)<sup>147</sup> with packages such as  
771 dplyr<sup>148</sup>, stringr<sup>149</sup>, rstatix<sup>150</sup>, ggplot2<sup>151</sup>, ComplexHeatmap<sup>152</sup>, and gggenes<sup>153</sup>. Differences  
772 between groups were determined by Student's *T*-test with p-values adjusted by the Benjamini-  
773 Hochberg method or ANOVA coupled with Tukey's post hoc test.  $p \leq 0.05$  was defined as  
774 statistically significant. Significance codes are as follows:  $p > 0.05$  (ns),  $0.01 < p \leq 0.05$  (\*),  
775  $0.001 < p \leq 0.01$  (\*\*),  $0.0001 < p \leq 0.001$  (\*\*\*), and  $p \leq 0.0001$  (\*\*\*\*).

## 776 **Availability of data and materials**

777 The raw whole genome sequencing data of bacteria isolates are available in the NCBI SRA  
778 repository under BioProject number PRJNA1169385. The data will be accessible upon  
779 manuscript acceptance. Source code for the analyses are available under MIT license at  
780 [https://github.com/hartmann-lab/Chlorhexidine\\_Tolerance\\_Hospital\\_Environments](https://github.com/hartmann-lab/Chlorhexidine_Tolerance_Hospital_Environments). Bacteria  
781 isolates are available upon request (erica.hartmann@northwestern.edu).

## 782 **Supplementary figures**

783 **Fig. S1 Coupons used in the microcosm experiments examining chlorhexidine persistence.**

784 Grids on the coupons indicate specific swabbing sites.

785 **Fig. S2 a) Floor plan of the Medical Intensive Care Unit at the sampled hospital. b)**

786 **Illustrations of the swabbed area for the sampled environmental locations.**

787 **Fig. S3 Cultivation and screening pipeline.** TSAI is tryptic soy agar (TSA) supplemented with  
788 4 mg/L itraconazole. TSA+CHX is TSA containing 10.56  $\mu\text{g/mL}$  chlorhexidine powder  
789 (equivalent to 18.75  $\mu\text{g/mL}$  CHG).

790 **Fig. S4 Absolute bioburden of bacteria ( $\log_{10}\text{CFU}$ ) in the entirety of the dry surfaces and by**  
791 **swabbing the proximal sink drain.** The bacteria CFUs were not normalized by sampling area.  
792 Differences between groups were determined by unpaired *t*-tests with the Benjamini-Hochberg  
793 adjustment. To avoid mis-interpreting data with small colony counts, we empirically set the limit  
794 of quantification (LOQ) of our culture efforts as colony counts = 3. Values below this threshold  
795 were recorded as half of LOQ (i.e., 1.5). Nurse call button is abbreviated as nurse call in the  
796 figure.



797 **Fig. S5 No significant differences were observed in: a)** Unit area bioburden of bacteria  
798 between the two sampling seasons, **b)** Unit area bioburden of bacteria between patient rooms  
799 with contact isolation and those without, and **c)** Proportions of CHG-tolerant bacteria (tolerating  
800 18.75 µg/mL CHG at 25°C) between contact isolation levels of patient rooms. Cultivation  
801 temperature was 25°C for all cases. Nurse call button is abbreviated as nurse call in the figure.

802 **Fig. S6 A phylogenetic tree of all sequenced isolates.**

803 **Fig. S7 Potential dissemination of opportunistic pathogens across multiple MICU rooms.**  
804 Patient rooms were deidentified. Each panel shows one species with multiple isolates detected in  
805 sink drains of different MICU rooms during the same sampling event.

806 **Fig. S8 Analysis pipeline of whole-genome sequences.**

## 807 [Supplementary tables](#)

808 **Table S1 Epidemiological cut-off values for CHG resistance.**

809 **Table S2 Statistical testing results of CHG persistence on surfaces.** List of abbreviations for  
810 cleaning: C="No liquid", W= "Water", Q= "Benzalkonium chloride", P= "Peracetic acid", B=  
811 "Bleach", E= "Ethanol"

812 **Table S3 Sample collection metadata. a)** Specific sampling locations within the MICU **b)**  
813 Distribution of Number of collected samples for each sampling event **c)** List of Abbreviations for  
814 sampling locations and space types **d)** Surface area of sampling locations

815 **Table S4 Antibiotic resistance genes (ARGs, curated CARD short name) predicted using**  
816 **Resistance Gene Identifier (RGI) and Comprehensive Antibiotic Resistance Database**  
817 **(CARD) under Perfect and Strict paradigms**, with further annotations of ARG health risk  
818 (blue), chlorhexidine MICs (green), taxonomic assignments (orange), sample collection and  
819 cultivation results (purple), mobile ARGs (gray). List of abbreviations for Space Type: MD =  
820 "Medication room", PT = "Patient room", CM = "Communicating space", ST = "Staff-only  
821 restroom." Room numbers were deidentified by randomly generating unique numbers.

822 **Table S5 Additional information of *qacEdelta1*-carrying multidrug-resistant plasmid**  
823 **scaffolds. a)** Metadata of *qacEdelta1*-carrying plasmid scaffolds. **b)** Intra-species similarity of  
824 *qacEdelta1*-carrying plasmid scaffolds determined by blastn. **c)** Inter-species similarity of  
825 *qacEdelta1*-carrying plasmid scaffolds determined by blastn. **d)** Assessment of the completeness  
826 of plasmid scaffolds. **e)** The top BLAST hits for type-1 plasmid scaffolds matched two plasmids

827 from clinical *P. aeruginosa* strains - one from a bloodstream infection and the other from sputum  
828 - both collected in Chicago.

829 **Table S6 Reports of the highest CHG MICs ( $\mu\text{g/mL}$ ) for environmental isolates.** Bacteria  
830 isolated in our study, especially those from sinks, exhibited MICs at the high end of this  
831 spectrum.

832 **Table S7 Recovery rate of CHG on different surface materials.** The recovery rate measured  
833 for surfaces was the integrative rate, representing the overall impacts of swabbing on surfaces,  
834 extracting CHG from the swab, and all the loss in the process.

835 **Table S8 Transfer rate of chlorhexidine digluconate (CHG) from Kimwipe to surfaces by**  
836 **wiping.**

837 **Table S9 A targeted review of antibiotic resistance genes (ARGs) conferring resistance to**  
838 **chlorhexidine.** CHX resistance: Y, confer resistance to CHX; N, do not confer resistance; C,  
839 controversial with conflicting results. Correlation & causality: Y, evidence available; N,  
840 evidence not available; NA, not applicable.

## 841 **Acknowledgements**

842 This study was partially supported by the Searle Leadership Fund and the Northwestern  
843 University 2020 NUSeq Pilot Project Program. Additionally, the computational resources and  
844 staff contributions provided by the Quest high performance computing facility at Northwestern  
845 University, which is jointly supported by the Office of the Provost, the Office for Research, and  
846 Northwestern University Information Technology, were instrumental.

847 JS was supported by Northwestern University Terminal Year Fellowship from the Richter  
848 Memorial Fund. Undergraduate researchers received support from Northwestern University  
849 Undergraduate Research Grants: AW from the Buffett Institute, MK from the Weinberg College  
850 of Arts and Sciences Summer Undergraduate Research Grant, and YW and YS from the Office  
851 of Undergraduate Research Summer Undergraduate Research Grant.

852 We are deeply thankful to Teppei Shimasaki, Khaled Aboushaala, Thelma Dangana, Yoona  
853 Rhee and Alexander G. McFarland for their help in sample collection and coordination. Our  
854 appreciation extends to the clinical staff of the Medical Intensive Care Unit at Rush University  
855 Medical Center. We gratefully acknowledge Adam J. Glawe and James Lindsay for their  
856 contributions to microbial cultivation. Finally, we would like to thank the anonymous reviewers  
857 whose insights significantly improved this manuscript.

## 858 Reference

- 859 1 Knox, C. *et al.* DrugBank 6.0: the DrugBank Knowledgebase for 2024. *Nucleic Acids Res*  
860 **52**, D1265-D1275, doi:10.1093/nar/gkad976 (2024).
- 861 2 Malakova, I. H. T. Effect on Skin Microflora in Hygienic Bathing of Patients with  
862 Chlorhexidine Gluconate Disinfectant and Non-Rinse Product. *Health Sci J.*,  
863 doi:10.36648/1791-809X.14.2.708 (2020).
- 864 3 Popovich, K. J. *et al.* Relationship between chlorhexidine gluconate skin concentration  
865 and microbial density on the skin of critically ill patients bathed daily with chlorhexidine  
866 gluconate. *Infect Control Hosp Epidemiol* **33**, 889-896, doi:10.1086/667371 (2012).
- 867 4 Rupp, M. E. *et al.* Effect of hospital-wide chlorhexidine patient bathing on healthcare-  
868 associated infections. *Infect Control Hosp Epidemiol* **33**, 1094-1100, doi:10.1086/668024  
869 (2012).
- 870 5 Fruh, R. *et al.* Antibiotic Resistance of Selected Bacteria after Treatment of the  
871 Supragingival Biofilm with Subinhibitory Chlorhexidine Concentrations. *Antibiotics*  
872 (*Basel*) **11**, doi:10.3390/antibiotics11101420 (2022).
- 873 6 Bhardwaj, P., Hans, A., Ruikar, K., Guan, Z. & Palmer, K. L. Reduced Chlorhexidine  
874 and Daptomycin Susceptibility in Vancomycin-Resistant *Enterococcus faecium* after  
875 Serial Chlorhexidine Exposure. *Antimicrob Agents Chemother* **62**,  
876 doi:10.1128/AAC.01235-17 (2018).
- 877 7 Baseri, N., Najar-Peerayeh, S., Bakhshi, B. & Campanile, F. Phenotypic and genotypic  
878 changes of *Staphylococcus aureus* in the presence of the inappropriate concentration of  
879 chlorhexidine gluconate. *BMC Microbiol* **22**, 100, doi:10.1186/s12866-022-02522-0  
880 (2022).
- 881 8 Laumen, J. G. E. *et al.* Sub-Inhibitory Concentrations of Chlorhexidine Induce Resistance  
882 to Chlorhexidine and Decrease Antibiotic Susceptibility in *Neisseria gonorrhoeae*. *Front*  
883 *Microbiol* **12**, 776909, doi:10.3389/fmicb.2021.776909 (2021).
- 884 9 Das, R., Sarkar, S. & Bhattacharjee, C. Photocatalytic degradation of chlorhexidine—A  
885 chemical assessment and prediction of optimal condition by response surface  
886 methodology. *Journal of Water Process Engineering* **2**, 79-86,  
887 doi:<https://doi.org/10.1016/j.jwpe.2014.05.005> (2014).
- 888 10 Sarkar, S., Bhattacharjee, C. & Curcio, S. Studies on adsorption, reaction mechanisms  
889 and kinetics for photocatalytic degradation of CHD, a pharmaceutical waste. *Ecotoxicol*  
890 *Environ Saf* **121**, 154-163, doi:10.1016/j.ecoenv.2015.04.036 (2015).
- 891 11 Zong, Z. & Kirsch, L. E. Studies on the Instability of Chlorhexidine, Part I: Kinetics and  
892 Mechanisms. *Journal of Pharmaceutical Sciences* **101**, 2417-2427,  
893 doi:<https://doi.org/10.1002/jps.23151> (2012).
- 894 12 Kampf, G. Acquired resistance to chlorhexidine - is it time to establish an 'antiseptic  
895 stewardship' initiative? *J Hosp Infect* **94**, 213-227, doi:10.1016/j.jhin.2016.08.018 (2016).
- 896 13 Babiker, A., Lutgring, J. D., Fridkin, S. & Hayden, M. K. Assessing the Potential for  
897 Unintended Microbial Consequences of Routine Chlorhexidine Bathing for Prevention of  
898 Healthcare-associated Infections. *Clin Infect Dis* **72**, 891-898, doi:10.1093/cid/cia1103  
899 (2021).
- 900 14 Van den Poel, B., Saegeman, V. & Schuermans, A. Increasing usage of chlorhexidine in  
901 health care settings: blessing or curse? A narrative review of the risk of chlorhexidine  
902 resistance and the implications for infection prevention and control. *Eur J Clin Microbiol*  
903 *Infect Dis* **41**, 349-362, doi:10.1007/s10096-022-04403-w (2022).

- 904 15 Kõljalg, S., Naaber, P. & Mikelsaar, M. Antibiotic resistance as an indicator of bacterial  
905 chlorhexidine susceptibility. *Journal of Hospital Infection* **51**, 106-113,  
906 doi:10.1053/jhin.2002.1204 (2002).
- 907 16 Keck, N. *et al.* Long-lasting nosocomial persistence of chlorhexidine-resistant *Serratia*  
908 *marcescens* in a veterinary hospital. *Vet Microbiol* **245**, 108686,  
909 doi:10.1016/j.vetmic.2020.108686 (2020).
- 910 17 Vigeant, P. *et al.* An outbreak of *Serratia marcescens* infections related to contaminated  
911 chlorhexidine. *Infect Control Hosp Epidemiol* **19**, 791-794, doi:10.1086/647728 (1998).
- 912 18 Okuda, T., Endo, N., Osada, Y. & Zen-Yoji, H. Outbreak of nosocomial urinary tract  
913 infections caused by *Serratia marcescens*. *Journal of Clinical Microbiology* **20**, 691-695,  
914 doi:10.1128/jcm.20.4.691-695.1984 (1984).
- 915 19 Allen, J. L., Doidge, N. P., Bushell, R. N., Browning, G. F. & Marena, M. S.  
916 Healthcare-associated infections caused by chlorhexidine-tolerant *Serratia marcescens*  
917 carrying a promiscuous IncHI2 multi-drug resistance plasmid in a veterinary hospital.  
918 *PLOS ONE* **17**, e0264848, doi:10.1371/journal.pone.0264848 (2022).
- 919 20 Carey, D. E. & McNamara, P. J. The impact of triclosan on the spread of antibiotic  
920 resistance in the environment. *Front Microbiol* **5**, 780, doi:10.3389/fmicb.2014.00780  
921 (2014).
- 922 21 Jutkina, J., Marathe, N. P., Flach, C. F. & Larsson, D. G. J. Antibiotics and common  
923 antibacterial biocides stimulate horizontal transfer of resistance at low concentrations. *Sci*  
924 *Total Environ* **616-617**, 172-178, doi:10.1016/j.scitotenv.2017.10.312 (2018).
- 925 22 Vásquez-Giraldo, D. F., Libreros-Zúñiga, G. A. & Crespo-Ortiz, M. d. P. Effects of  
926 biocide exposure on *P. Aeruginosa*, *E. coli* and *A. Baumannii* complex isolates from  
927 hospital and household environments. *Infectio* **21**, 243-250 (2017).
- 928 23 Braga, T. M., Pomba, C. & Lopes, M. F. S. High-level vancomycin resistant  
929 *Enterococcus faecium* related to humans and pigs found in dust from pig breeding  
930 facilities. *Vet. Microbiol.* **161**, 344-349, doi:<https://doi.org/10.1016/j.vetmic.2012.07.034>  
931 (2013).
- 932 24 Namaki Kheljan, M., Teymorpour, R., Peeri Doghaheh, H. & Arzanlou, M.  
933 Antimicrobial Biocides Susceptibility and Tolerance-Associated Genes in *Enterococcus*  
934 *faecalis* and *Enterococcus faecium* Isolates Collected from Human and Environmental  
935 Sources. *Current Microbiology* **79**, 170, doi:10.1007/s00284-022-02858-w (2022).
- 936 25 Horner, C., Mawer, D. & Wilcox, M. Reduced susceptibility to chlorhexidine in  
937 staphylococci: is it increasing and does it matter? *J Antimicrob Chemother* **67**, 2547-  
938 2559, doi:10.1093/jac/dks284 (2012).
- 939 26 Morrissey, I. *et al.* Evaluation of Epidemiological Cut-Off Values Indicates that Biocide  
940 Resistant Subpopulations Are Uncommon in Natural Isolates of Clinically-Relevant  
941 Microorganisms. *PLOS ONE* **9**, e86669, doi:10.1371/journal.pone.0086669 (2014).
- 942 27 Denk, L. A. *et al.* Chlorhexidine and octenidine susceptibility of bacterial isolates from  
943 clinical samples in a three-armed cluster randomised decolonisation trial. *PLoS One* **17**,  
944 e0278569, doi:10.1371/journal.pone.0278569 (2022).
- 945 28 Tran, G. *et al.* Evidence of incompatibility for topical anionic agents used in conjunction  
946 with chlorhexidine gluconate: A systematic review. *Journal of Surgical Dermatology*  
947 (2016).

- 948 29 Kaiser, N., Klein, D., Karanja, P., Greten, Z. & Newman, J. Inactivation of chlorhexidine  
949 gluconate on skin by incompatible alcohol hand sanitizing gels. *Am J Infect Control* **37**,  
950 569-573, doi:10.1016/j.ajic.2008.12.008 (2009).
- 951 30 Zong, Z. & Kirsch, L. E. Studies on the instability of chlorhexidine, part I: kinetics and  
952 mechanisms. *J Pharm Sci* **101**, 2417-2427, doi:10.1002/jps.23151 (2012).
- 953 31 Abu-Obaid, E. *et al.* Comparative Evaluation of the Antimicrobial Effects of Different  
954 Mouthrinses against Streptococcus Mutans: An in Vitro Study. *J Clin Pediatr Dent* **43**,  
955 398-407, doi:10.17796/1053-4625-43.6.7 (2019).
- 956 32 Choi, J. S. [Evaluation of a waterless, scrubless chlorhexidine gluconate/ethanol surgical  
957 scrub and povidone-iodine for antimicrobial efficacy]. *Taehan Kanho Hakhoe Chi* **38**,  
958 39-44, doi:10.4040/jkan.2008.38.1.39 (2008).
- 959 33 Pons, J. L., Bonnaveiro, N., Chevalier, J. & Crémieux, A. Evaluation of antimicrobial  
960 interactions between chlorhexidine, quaternary ammonium compounds, preservatives and  
961 excipients. *J Appl Bacteriol* **73**, 395-400, doi:10.1111/j.1365-2672.1992.tb04994.x  
962 (1992).
- 963 34 Gkatzonis, A. M. *et al.* A randomized controlled clinical trial on the effectiveness of three  
964 different mouthrinses (chlorhexidine with or without alcohol and C31G), adjunct to  
965 periodontal surgery, in early wound healing. *Clin Oral Investig* **22**, 2581-2591,  
966 doi:10.1007/s00784-018-2357-6 (2018).
- 967 35 Marty Cooney, R. *et al.* The use of 3.15% chlorhexidine gluconate/70% alcohol hub  
968 disinfection to prevent central line-associated bloodstream infections in dialysis patients.  
969 *Br J Nurs* **29**, S24-s26, doi:10.12968/bjon.2020.29.2.S24 (2020).
- 970 36 Purdy, K. R. *Aspects of chlorhexidine degradation* Ph.D. thesis, University of Bath,  
971 (1987).
- 972 37 Lutgring, J. D. *et al.* Development of a Broth Microdilution Method To Characterize  
973 Chlorhexidine MICs among Bacteria Collected from 2005 to 2019 at Three U.S. Sites.  
974 *Microbiol Spectr* **11**, e0413422, doi:10.1128/spectrum.04134-22 (2023).
- 975 38 Htun, H. L., Hon, P. Y., Holden, M. T. G., Ang, B. & Chow, A. Chlorhexidine and  
976 octenidine use, carriage of qac genes, and reduced antiseptic susceptibility in methicillin-  
977 resistant Staphylococcus aureus isolates from a healthcare network. *Clin Microbiol Infect*  
978 **25**, 1154 e1151-1154 e1157, doi:10.1016/j.cmi.2018.12.036 (2019).
- 979 39 Adams, C. E., Smith, J., Watson, V., Robertson, C. & Dancer, S. J. Examining the  
980 association between surface bioburden and frequently touched sites in intensive care. *J*  
981 *Hosp Infect* **95**, 76-80, doi:10.1016/j.jhin.2016.11.002 (2017).
- 982 40 Sum, R., Swaminathan, M., Rastogi, S. K., Piloto, O. & Cheong, I. Beta-Hemolytic  
983 Bacteria Selectively Trigger Liposome Lysis, Enabling Rapid and Accurate Pathogen  
984 Detection. *ACS Sens* **2**, 1441-1451, doi:10.1021/acssensors.7b00333 (2017).
- 985 41 Brooke, J. S. *Stenotrophomonas maltophilia*: an emerging global opportunistic pathogen.  
986 *Clin Microbiol Rev* **25**, 2-41, doi:10.1128/CMR.00019-11 (2012).
- 987 42 Gao, H., Li, T., Feng, L. & Zhang, S. Elizabethkingia miricola Causes Intracranial  
988 Infection: A Case Study. *Front Med (Lausanne)* **8**, 761924,  
989 doi:10.3389/fmed.2021.761924 (2021).
- 990 43 Gonzalez, C. *et al.* [Severe sepsis and pulmonary abscess with bacteremia due to  
991 Elizabethkingia miricola]. *Med Mal Infect* **46**, 49-51, doi:10.1016/j.medmal.2015.10.011  
992 (2016).



- 993 44 Green, O., Murray, P. & Gea-Banacloche, J. C. Sepsis caused by Elizabethkingia  
994 miricola successfully treated with tigecycline and levofloxacin. *Diagn Microbiol Infect*  
995 *Dis* **62**, 430-432, doi:10.1016/j.diagmicrobio.2008.07.015 (2008).
- 996 45 Gupta, P., Zaman, K., Mohan, B. & Taneja, N. Elizabethkingia miricola: A rare non-  
997 fermenter causing urinary tract infection. *World J Clin Cases* **5**, 187-190,  
998 doi:10.12998/wjcc.v5.i5.187 (2017).
- 999 46 Howard, J. C., Chen, K., Anderson, T. & Dalton, S. C. Elizabethkingia miricola  
1000 bacteraemia in a haemodialysis patient. *Access Microbiol* **2**, acmi000098,  
1001 doi:10.1099/acmi.0.000098 (2020).
- 1002 47 Kalchev, Y., Petrova, A., Lengerova, G., Ivanov, I. & Murdjeva, M. Elizabethkingia  
1003 miricola Recovered from a Peritoneal Fluid Sample – A Clinical Case Report with  
1004 Diagnostic Challenges. *Open Access Macedonian Journal of Medical Sciences* **10**, 28-31,  
1005 doi:10.3889/oamjms.2022.7716 (2022).
- 1006 48 Soler, E. *et al.* Elizabethkingia miricola: an opportunistic pathogen in ICU. *European*  
1007 *Journal of Public Health* **32**, ckac131.406, doi:10.1093/eurpub/ckac131.406 (2022).
- 1008 49 Zdziarski, P., Paściak, M., Rogala, K., Korzeniowska-Kowal, A. & Gamian, A.  
1009 Elizabethkingia miricola as an opportunistic oral pathogen associated with  
1010 superinfectious complications in humoral immunodeficiency: a case report. *BMC*  
1011 *Infectious Diseases* **17**, 763, doi:10.1186/s12879-017-2886-7 (2017).
- 1012 50 Choi, M. H. *et al.* Risk Factors for Elizabethkingia Acquisition and Clinical  
1013 Characteristics of Patients, South Korea. *Emerg Infect Dis* **25**, 42-51,  
1014 doi:10.3201/eid2501.171985 (2019).
- 1015 51 Prevention, C. f. D. C. a. *Pseudomonas aeruginosa in Healthcare Settings*,  
1016 <<https://www.cdc.gov/hai/organisms/pseudomonas.html>> (2019).
- 1017 52 Tacconelli, E. *et al.* Discovery, research, and development of new antibiotics: the WHO  
1018 priority list of antibiotic-resistant bacteria and tuberculosis. *The Lancet Infectious*  
1019 *Diseases* **18**, 318-327, doi:[https://doi.org/10.1016/S1473-3099\(17\)30753-3](https://doi.org/10.1016/S1473-3099(17)30753-3) (2018).
- 1020 53 Manner, C. *et al.* A genetic switch controls Pseudomonas aeruginosa surface  
1021 colonization. *Nat Microbiol* **8**, 1520-1533, doi:10.1038/s41564-023-01403-0 (2023).
- 1022 54 Lazarev, A., Hyun, J., Sanchez, J. L. & Verda, L. Community-Acquired Acinetobacter  
1023 radioresistens Bacteremia in an Immunocompetent Host. *Cureus* **14**, e29650,  
1024 doi:10.7759/cureus.29650 (2022).
- 1025 55 Verma, R. & Baroco, A. L. Acinetobacter radioresistens Septicemia Associated With  
1026 Pneumonia in a Patient With Chronic Obstructive Pulmonary Disease and Hepatitis C.  
1027 *Infectious Diseases in Clinical Practice* **25**, e12-e13, doi:10.1097/ipc.0000000000000521  
1028 (2017).
- 1029 56 Visca, P. *et al.* Community-acquired Acinetobacter radioresistens bacteremia in an HIV-  
1030 positive patient. *Emerg Infect Dis* **7**, 1032-1035, doi:10.3201/eid0706.010621 (2001).
- 1031 57 Wang, T., Costa, V., Jenkins, S. G., Hartman, B. J. & Westblade, L. F. Acinetobacter  
1032 radioresistens infection with bacteremia and pneumonia. *IDCases* **15**, e00495,  
1033 doi:10.1016/j.idcr.2019.e00495 (2019).
- 1034 58 Poirel, L., Figueiredo, S., Cattoir, V., Carattoli, A. & Nordmann, P. Acinetobacter  
1035 radioresistens as a silent source of carbapenem resistance for Acinetobacter spp.  
1036 *Antimicrob Agents Chemother* **52**, 1252-1256, doi:10.1128/AAC.01304-07 (2008).
- 1037 59 Rodriguez, R. L. *et al.* An ANI gap within bacterial species that advances the definitions  
1038 of intra-species units. *mBio* **15**, e0269623, doi:10.1128/mbio.02696-23 (2024).



- 1039 60 Viver, T. *et al.* Towards estimating the number of strains that make up a natural bacterial  
1040 population. *Nat Commun* **15**, 544, doi:10.1038/s41467-023-44622-z (2024).
- 1041 61 Kotay, S., Chai, W., Guilford, W., Barry, K. & Mathers, A. J. Spread from the Sink to the  
1042 Patient: In Situ Study Using Green Fluorescent Protein (GFP)-Expressing *Escherichia*  
1043 *coli* To Model Bacterial Dispersion from Hand-Washing Sink-Trap Reservoirs. *Applied*  
1044 *and environmental microbiology* **83**, e03327-03316, doi:10.1128/AEM.03327-16 (2017).
- 1045 62 Langevin, S., Vincelette, J., Bekal, S. & Gaudreau, C. First case of invasive human  
1046 infection caused by *Cupriavidus metallidurans*. *J Clin Microbiol* **49**, 744-745,  
1047 doi:10.1128/JCM.01947-10 (2011).
- 1048 63 Ranc, A., Dubourg, G., Fournier, P. E., Raoult, D. & Fenollar, F. *Delftia tsuruhatensis*, an  
1049 Emergent Opportunistic Healthcare-Associated Pathogen. *Emerg Infect Dis* **24**, 594-596,  
1050 doi:10.3201/eid2403.160939 (2018).
- 1051 64 Yin, Z. *et al.* Pan-Genome Analysis of *Delftia tsuruhatensis* Reveals Important Traits  
1052 Concerning the Genetic Diversity, Pathogenicity, and Biotechnological Properties of the  
1053 Species. *Microbiol Spectr* **10**, e0207221, doi:10.1128/spectrum.02072-21 (2022).
- 1054 65 Hojgaard, S. M. M. *et al.* Characteristics and Outcomes of Patients with *Delftia*  
1055 *acidovorans* Infections: a Retrospective Cohort Study. *Microbiol Spectr* **10**, e0032622,  
1056 doi:10.1128/spectrum.00326-22 (2022).
- 1057 66 Bilgin, H., Sarmis, A., Tigen, E., Soyletir, G. & Mulazimoglu, L. *Delftia acidovorans*: A  
1058 rare pathogen in immunocompetent and immunocompromised patients. *Can J Infect Dis*  
1059 *Med Microbiol* **26**, 277-279, doi:10.1155/2015/973284 (2015).
- 1060 67 Khan, S., Sistla, S., Dhodapkar, R. & Parija, S. C. Fatal *Delftia acidovorans* infection in  
1061 an immunocompetent patient with empyema. *Asian Pac J Trop Biomed* **2**, 923-924,  
1062 doi:10.1016/S2221-1691(12)60254-8 (2012).
- 1063 68 Zhang, Z. *et al.* Assessment of global health risk of antibiotic resistance genes. *Nat*  
1064 *Commun* **13**, 1553, doi:10.1038/s41467-022-29283-8 (2022).
- 1065 69 Kazama, H., Hamashima, H., Sasatsu, M. & Arai, T. Distribution of the antiseptic-  
1066 resistance gene *qacEΔ1* in Gram-positive bacteria. *FEMS Microbiology Letters* **165**, 295-  
1067 299, doi:10.1111/j.1574-6968.1998.tb13160.x (1998).
- 1068 70 Chen, Y. *et al.* Determining the susceptibility of carbapenem resistant *Klebsiella*  
1069 *pneumoniae* and *Escherichia coli* strains against common disinfectants at a tertiary  
1070 hospital in China. *BMC Infect Dis* **20**, 88, doi:10.1186/s12879-020-4813-6 (2020).
- 1071 71 Pastrana-Carrasco, J. *et al.* [QacEdelta1 gene frequency and biocide resistance in  
1072 extended-spectrum beta-lactamase producing enterobacteriaceae clinical isolates]. *Rev*  
1073 *Invest Clin* **64**, 535-540 (2012).
- 1074 72 Furi, L. *et al.* Evaluation of Reduced Susceptibility to Quaternary Ammonium  
1075 Compounds and Bisbiguanides in Clinical Isolates and Laboratory-Generated Mutants of  
1076 *Staphylococcus aureus*. *Antimicrobial Agents and Chemotherapy* **57**, 3488,  
1077 doi:10.1128/AAC.00498-13 (2013).
- 1078 73 Hardy, K. *et al.* Increased Usage of Antiseptics Is Associated with Reduced  
1079 Susceptibility in Clinical Isolates of *Staphylococcus aureus*. *mBio* **9**, e00894-00818,  
1080 doi:10.1128/mBio.00894-18 (2018).
- 1081 74 Liu, Q. *et al.* Frequency of biocide-resistant genes and susceptibility to chlorhexidine in  
1082 high-level mupirocin-resistant, methicillin-resistant *Staphylococcus aureus* (MuH  
1083 MRSA). *Diagn Microbiol Infect Dis* **82**, 278-283,  
1084 doi:10.1016/j.diagmicrobio.2015.03.023 (2015).

- 1085 75 Kroning, I. S. *et al.* New spa types, resistance to sanitisers and presence of efflux pump  
1086 genes in *Staphylococcus aureus* from milk. *International Dairy Journal* **109**, 104712,  
1087 doi:<https://doi.org/10.1016/j.idairyj.2020.104712> (2020).
- 1088 76 Alcock, B. P. *et al.* CARD 2023: expanded curation, support for machine learning, and  
1089 resistome prediction at the Comprehensive Antibiotic Resistance Database. *Nucleic Acids*  
1090 *Res* **51**, D690-D699, doi:10.1093/nar/gkac920 (2023).
- 1091 77 Madden, T. *The BLAST Sequence Analysis Tool*. 16 (National Center for Biotechnology  
1092 Information (US), 2003).
- 1093 78 Coenye, T., Spilker, T., Reik, R., Vandamme, P. & Lipuma, J. J. Use of PCR analyses to  
1094 define the distribution of *Ralstonia* species recovered from patients with cystic fibrosis. *J*  
1095 *Clin Microbiol* **43**, 3463-3466, doi:10.1128/JCM.43.7.3463-3466.2005 (2005).
- 1096 79 D'Inzeo, T. *et al.* Catheter-related bacteremia by *Cupriavidus metallidurans*. *Diagn*  
1097 *Microbiol Infect Dis* **81**, 9-12, doi:10.1016/j.diagmicrobio.2014.09.015 (2015).
- 1098 80 Velazquez, S. *et al.* From one species to another: A review on the interaction between  
1099 chemistry and microbiology in relation to cleaning in the built environment. *Indoor air*  
1100 **29**, 880-894 (2019).
- 1101 81 FA, P. & DJ, F. Prevalence of gentamicin- and amikacin-resistant bacteria in sink drains.  
1102 *Journal of clinical microbiology* **12**, doi:10.1128/JCM.12.1.79-83.1980 (1980).
- 1103 82 MH, L., B, O., C, N., SA, K. & RA, W. *Pseudomonas* in the sinks in an intensive care  
1104 unit: relation to patients. *Journal of clinical pathology* **37**, doi:10.1136/jcp.37.4.424  
1105 (1984).
- 1106 83 Rutala, W. A. & Weber, D. J. Water as a reservoir of nosocomial pathogens. *Infect*  
1107 *Control Hosp Epidemiol* **18**, 609-616 (1997).
- 1108 84 Cohen, N. R., Lobritz, M. A. & Collins, J. J. Microbial persistence and the road to drug  
1109 resistance. *Cell Host Microbe* **13**, 632-642, doi:10.1016/j.chom.2013.05.009 (2013).
- 1110 85 Hu, J. & Hartmann, E. M. Anthropogenic chemicals and their impacts on microbes living  
1111 in buildings. *Microb Biotechnol*, doi:10.1111/1751-7915.13676 (2020).
- 1112 86 Lax, S. *et al.* Microbial and metabolic succession on common building materials under  
1113 high humidity conditions. *Nat Commun* **10**, 1767, doi:10.1038/s41467-019-09764-z  
1114 (2019).
- 1115 87 Inkster, T., Walker, J. & Weinbren, M. Water-free patient care: a narrative review of the  
1116 literature and discussion of the pressing need for a way forward. *J Hosp Infect* **152**, 36-  
1117 41, doi:10.1016/j.jhin.2024.06.006 (2024).
- 1118 88 Adams, R. I. *et al.* Passive dust collectors for assessing airborne microbial material.  
1119 *Microbiome* **3**, 46, doi:10.1186/s40168-015-0112-7 (2015).
- 1120 89 Barberan, A. *et al.* The ecology of microscopic life in household dust. *Proc Biol Sci* **282**,  
1121 doi:10.1098/rspb.2015.1139 (2015).
- 1122 90 Emerson, J. B. *et al.* High temporal variability in airborne bacterial diversity and  
1123 abundance inside single-family residences. *Indoor Air* **27**, 576-586,  
1124 doi:10.1111/ina.12347 (2017).
- 1125 91 Adams, C. E. & Dancer, S. J. Dynamic Transmission of *Staphylococcus Aureus* in the  
1126 Intensive Care Unit. *Int J Environ Res Public Health* **17**, doi:10.3390/ijerph17062109  
1127 (2020).
- 1128 92 Kozajda, A., Jezak, K. & Kapsa, A. Airborne *Staphylococcus aureus* in different  
1129 environments-a review. *Environ Sci Pollut Res Int* **26**, 34741-34753,  
1130 doi:10.1007/s11356-019-06557-1 (2019).

- 1131 93 Shen, J., McFarland, A. G., Young, V. B., Hayden, M. K. & Hartmann, E. M. Toward  
1132 Accurate and Robust Environmental Surveillance Using Metagenomics. *Frontiers in*  
1133 *Genetics* **12**, doi:10.3389/fgene.2021.600111 (2021).
- 1134 94 Shen, J. *et al.* An improved workflow for accurate and robust healthcare environmental  
1135 surveillance using metagenomics. *Microbiome* **10**, 206, doi:10.1186/s40168-022-01412-x  
1136 (2022).
- 1137 95 Skovgaard, S. *et al.* Recently introduced qacA/B genes in *Staphylococcus epidermidis* do  
1138 not increase chlorhexidine MIC/MBC. *J Antimicrob Chemother* **68**, 2226-2233,  
1139 doi:10.1093/jac/dkt182 (2013).
- 1140 96 Crofts, T. S., McFarland, A. G. & Hartmann, E. M. Mosaic Ends Tagmentation (METa)  
1141 Assembly for Highly Efficient Construction of Functional Metagenomic Libraries.  
1142 *mSystems* **6**, e0052421, doi:10.1128/mSystems.00524-21 (2021).
- 1143 97 Maillard, J. Y. & Pascoe, M. Disinfectants and antiseptics: mechanisms of action and  
1144 resistance. *Nat Rev Microbiol* **22**, 4-17, doi:10.1038/s41579-023-00958-3 (2024).
- 1145 98 Brauner, A., Fridman, O., Gefen, O. & Balaban, N. Q. Distinguishing between resistance,  
1146 tolerance and persistence to antibiotic treatment. *Nature Reviews Microbiology* **14**, 320-  
1147 330, doi:10.1038/nrmicro.2016.34 (2016).
- 1148 99 Rhee, Y. *et al.* Relationship between chlorhexidine gluconate concentration and  
1149 microbial colonization of patients' skin. *Infect Control Hosp Epidemiol*, 1-6,  
1150 doi:10.1017/ice.2024.81 (2024).
- 1151 100 CLSI. (Clinical and Laboratory Standards Institute, Wayne, PA, 2018).
- 1152 101 Aftab, R., Dodhia, V. H., Jeanes, C. & Wade, R. G. Bacterial sensitivity to chlorhexidine  
1153 and povidone-iodine antiseptics over time: a systematic review and meta-analysis of  
1154 human-derived data. *Scientific Reports* **13**, 347, doi:10.1038/s41598-022-26658-1 (2023).
- 1155 102 Cowley, N. L. *et al.* Effects of Formulation on Microbicide Potency and Mitigation of the  
1156 Development of Bacterial Insusceptibility. *Appl Environ Microbiol* **81**, 7330-7338,  
1157 doi:10.1128/AEM.01985-15 (2015).
- 1158 103 de Frutos, M. *et al.* *Serratia marcescens* outbreak due to contaminated 2% aqueous  
1159 chlorhexidine. *Enferm Infecc Microbiol Clin* **35**, 624-629,  
1160 doi:10.1016/j.eimc.2016.06.016 (2017).
- 1161 104 Buxser, S. Has resistance to chlorhexidine increased among clinically-relevant bacteria?  
1162 A systematic review of time course and subpopulation data. *PLOS ONE* **16**, e0256336,  
1163 doi:10.1371/journal.pone.0256336 (2021).
- 1164 105 Kawamura-Sato, K., Wachino, J. I., Kondo, T., Ito, H. & Arakawa, Y. Correlation  
1165 between reduced susceptibility to disinfectants and multidrug resistance among clinical  
1166 isolates of *Acinetobacter* species. *Journal of Antimicrobial Chemotherapy* **65**, 1975-1983,  
1167 doi:10.1093/jac/dkq227 (2010).
- 1168 106 Lambert, R. J. W., Joynson, J. & Forbes, B. The relationships and susceptibilities of some  
1169 industrial, laboratory and clinical isolates of *Pseudomonas aeruginosa* to some antibiotics  
1170 and biocides. *Journal of Applied Microbiology* **91**, 972-984, doi:10.1046/j.1365-  
1171 2672.2001.01460.x (2001).
- 1172 107 Lepointeur, M. *et al.* Prevalence of resistance to antiseptics and mupirocin among  
1173 invasive coagulase-negative staphylococci from very preterm neonates in NICU: The  
1174 creeping threat? *Journal of Hospital Infection* **83**, 333-336,  
1175 doi:10.1016/j.jhin.2012.11.025 (2013).

- 1176 108 Long, M. *et al.* Disinfectant susceptibility of different Salmonella serotypes isolated from  
1177 chicken and egg production chains. *Journal of Applied Microbiology* **121**, 672-681,  
1178 doi:10.1111/jam.13184 (2016).
- 1179 109 Evans, H. L. *et al.* Effect of chlorhexidine whole-body bathing on hospital-acquired  
1180 infections among trauma patients. *Arch Surg* **145**, 240-246, doi:10.1001/archsurg.2010.5  
1181 (2010).
- 1182 110 Climo, M. W. *et al.* Effect of daily chlorhexidine bathing on hospital-acquired infection.  
1183 *N Engl J Med* **368**, 533-542, doi:10.1056/NEJMoa1113849 (2013).
- 1184 111 Arnold, B. *et al.* Review of Quaternary Ammonium Compounds: A Chemical Class of  
1185 Emerging Concern. *Environmental Science & Technology*.
- 1186 112 Blaustein, R. A. *et al.* Toothbrush microbiomes feature a meeting ground for human oral  
1187 and environmental microbiota. *Microbiome* **9**, 32, doi:10.1186/s40168-020-00983-x  
1188 (2021).
- 1189 113 Shen, J. & Hartmann, E. M. Collect, extract, pool, and cultivate surface swab samples  
1190 from built environments. *Protocol Exchange*, doi:10.21203/rs.3.pex-1656/v1 (2022).
- 1191 114 Edmiston, C. E., Jr. *et al.* Preoperative shower revisited: can high topical antiseptic levels  
1192 be achieved on the skin surface before surgical admission? *J Am Coll Surg* **207**, 233-239,  
1193 doi:10.1016/j.jamcollsurg.2007.12.054 (2008).
- 1194 115 Gefter Shenderovich, J. *et al.* Chlorhexidine sustained-release varnishes for catheter  
1195 coating - Dissolution kinetics and antibiofilm properties. *Eur J Pharm Sci* **112**, 1-7,  
1196 doi:10.1016/j.ejps.2017.10.041 (2018).
- 1197 116 West, A. M. *et al.* Surface area wiped, product type, and target strain impact bactericidal  
1198 efficacy of ready-to-use disinfectant Towelettes. *Antimicrob Resist Infect Control* **7**, 122,  
1199 doi:10.1186/s13756-018-0416-z (2018).
- 1200 117 Hu, J. *et al.* Impacts of indoor surface finishes on bacterial viability. *Indoor Air* **29**, 551-  
1201 562, doi:10.1111/ina.12558 (2019).
- 1202 118 Fridkin, S. K. Increasing prevalence of antimicrobial resistance in intensive care units.  
1203 *Crit Care Med* **29**, N64-68, doi:10.1097/00003246-200104001-00002 (2001).
- 1204 119 Kollef, M. H. & Fraser, V. J. Antibiotic resistance in the intensive care unit. *Ann Intern*  
1205 *Med* **134**, 298-314, doi:10.7326/0003-4819-134-4-200102200-00014 (2001).
- 1206 120 Hsu, T. *et al.* Urban Transit System Microbial Communities Differ by Surface Type and  
1207 Interaction with Humans and the Environment. *mSystems* **1**,  
1208 doi:10.1128/mSystems.00018-16 (2016).
- 1209 121 Rintala, H., Pitkaranta, M. & Taubel, M. Microbial communities associated with house  
1210 dust. *Adv Appl Microbiol* **78**, 75-120, doi:10.1016/B978-0-12-394805-2.00004-X (2012).
- 1211 122 Lax, S. *et al.* Bacterial colonization and succession in a newly opened hospital. *Sci Transl*  
1212 *Med* **9**, doi:10.1126/scitranslmed.aah6500 (2017).
- 1213 123 Huslage, K., Rutala, W. A., Sickbert-Bennett, E. & Weber, D. J. A quantitative approach  
1214 to defining "high-touch" surfaces in hospitals. *Infect Control Hosp Epidemiol* **31**, 850-  
1215 853, doi:10.1086/655016 (2010).
- 1216 124 Sehulster, L. M. *et al.* Guidelines for environmental infection control in health-care  
1217 facilities. Recommendations from CDC and the Healthcare Infection Control Practices  
1218 Advisory Committee (HICPAC). (Chicago IL, 2004).
- 1219 125 Jinadatha, C. *et al.* Interaction of healthcare worker hands and portable medical  
1220 equipment: a sequence analysis to show potential transmission opportunities. *BMC Infect*  
1221 *Dis* **17**, 800, doi:10.1186/s12879-017-2895-6 (2017).



- 1222 126 Cheng, V. C. *et al.* Hand-touch contact assessment of high-touch and mutual-touch  
1223 surfaces among healthcare workers, patients, and visitors. *J Hosp Infect* **90**, 220-225,  
1224 doi:10.1016/j.jhin.2014.12.024 (2015).
- 1225 127 Xu, S. *et al.* Effects of the biocides on the culturable house dust-borne bacterial  
1226 compositions and diversities. *Human and Ecological Risk Assessment: An International*  
1227 *Journal* **22**, 1133-1146, doi:10.1080/10807039.2016.1143769 (2016).
- 1228 128 Lederberg, J. & Lederberg, E. M. Replica plating and indirect selection of bacterial  
1229 mutants. *J Bacteriol* **63**, 399-406, doi:10.1128/JB.63.3.399-406.1952 (1952).
- 1230 129 McFarland, A. G. *et al.* Triclosan Tolerance Is Driven by a Conserved Mechanism in  
1231 Diverse Pseudomonas Species. *Applied and Environmental Microbiology* **87**,  
1232 doi:10.1128/aem.02924-20 (2021).
- 1233 130 Andrews, S. *et al.* *FastQC: a quality control tool for high throughput sequence data*,  
1234 <<http://www.bioinformatics.babraham.ac.uk/projects/fastqc>> (2016).
- 1235 131 Chen, S., Zhou, Y., Chen, Y. & Gu, J. fastp: an ultra-fast all-in-one FASTQ preprocessor.  
1236 *Bioinformatics* **34**, i884-i890, doi:10.1093/bioinformatics/bty560 (2018).
- 1237 132 Bankevich, A. *et al.* SPAdes: a new genome assembly algorithm and its applications to  
1238 single-cell sequencing. *J Comput Biol* **19**, 455-477, doi:10.1089/cmb.2012.0021 (2012).
- 1239 133 Parks, D. H., Imelfort, M., Skennerton, C. T., Hugenholtz, P. & Tyson, G. W. CheckM:  
1240 assessing the quality of microbial genomes recovered from isolates, single cells, and  
1241 metagenomes. *Genome Res* **25**, 1043-1055, doi:10.1101/gr.186072.114 (2015).
- 1242 134 Gurevich, A., Saveliev, V., Vyahhi, N. & Tesler, G. QUAST: quality assessment tool for  
1243 genome assemblies. *Bioinformatics* **29**, 1072-1075, doi:10.1093/bioinformatics/btt086  
1244 (2013).
- 1245 135 Ramsin, C. (2022).
- 1246 136 Clausen, P., Aarestrup, F. M. & Lund, O. Rapid and precise alignment of raw reads  
1247 against redundant databases with KMA. *BMC Bioinformatics* **19**, 307,  
1248 doi:10.1186/s12859-018-2336-6 (2018).
- 1249 137 Larsen, M. V. *et al.* Benchmarking of methods for genomic taxonomy. *J Clin Microbiol*  
1250 **52**, 1529-1539, doi:10.1128/JCM.02981-13 (2014).
- 1251 138 Hasman, H. *et al.* Rapid whole-genome sequencing for detection and characterization of  
1252 microorganisms directly from clinical samples. *J Clin Microbiol* **52**, 139-146,  
1253 doi:10.1128/JCM.02452-13 (2014).
- 1254 139 Asnicar, F. *et al.* Precise phylogenetic analysis of microbial isolates and genomes from  
1255 metagenomes using PhyloPhlAn 3.0. *Nat Commun* **11**, 2500, doi:10.1038/s41467-020-  
1256 16366-7 (2020).
- 1257 140 Alanjary, M., Steinke, K. & Ziemert, N. AutoMLST: an automated web server for  
1258 generating multi-locus species trees highlighting natural product potential. *Nucleic Acids*  
1259 *Res* **47**, W276-W282, doi:10.1093/nar/gkz282 (2019).
- 1260 141 Rodriguez, R. L. *et al.* The Microbial Genomes Atlas (MiGA) webserver: taxonomic and  
1261 gene diversity analysis of Archaea and Bacteria at the whole genome level. *Nucleic Acids*  
1262 *Res* **46**, W282-W288, doi:10.1093/nar/gky467 (2018).
- 1263 142 Sievers, F. & Higgins, D. G. Clustal Omega for making accurate alignments of many  
1264 protein sequences. *Protein Sci* **27**, 135-145, doi:10.1002/pro.3290 (2018).
- 1265 143 Camargo, A. P. *et al.* Identification of mobile genetic elements with geNomad. *Nat*  
1266 *Biotechnol*, doi:10.1038/s41587-023-01953-y (2023).

- 1267 144 Johansson, M. H. K. *et al.* Detection of mobile genetic elements associated with  
1268 antibiotic resistance in *Salmonella enterica* using a newly developed web tool:  
1269 MobileElementFinder. *J Antimicrob Chemother* **76**, 101-109, doi:10.1093/jac/dkaa390  
1270 (2021).
- 1271 145 Wang, M. *et al.* VRprofile2: detection of antibiotic resistance-associated mobilome in  
1272 bacterial pathogens. *Nucleic Acids Res* **50**, W768-W773, doi:10.1093/nar/gkac321  
1273 (2022).
- 1274 146 Maciel-Guerra, A. *et al.* Dissecting microbial communities and resistomes for  
1275 interconnected humans, soil, and livestock. *ISME J* **17**, 21-35, doi:10.1038/s41396-022-  
1276 01315-7 (2023).
- 1277 147 Team, R. C. R: A language and environment for statistical computing. (2013).
- 1278 148 Wickham, H., François, R., Henry, L. & Müller, K. *dplyr: A Grammar of Data*  
1279 *Manipulation*, <<https://dplyr.tidyverse.org>> (2022).
- 1280 149 Wickham, H. *stringr: Simple, consistent wrappers for common string operations*,  
1281 <<https://stringr.tidyverse.org>> (2023).
- 1282 150 Kassambara, A. *rstatix: Pipe-friendly framework for basic statistical tests*,  
1283 <<https://rpkgs.datanovia.com/rstatix/>> (2023).
- 1284 151 Wickham, H. *ggplot2: Elegant Graphics for Data Analysis*. (Springer-Verlag New York,  
1285 2016).
- 1286 152 Gu, Z., Eils, R. & Schlesner, M. Complex heatmaps reveal patterns and correlations in  
1287 multidimensional genomic data. *Bioinformatics* **32**, 2847-2849,  
1288 doi:10.1093/bioinformatics/btw313 (2016).
- 1289 153 Wilkins, D. *gggenes: Draw gene arrow maps in 'ggplot2'*, <[https://CRAN.R-](https://CRAN.R-project.org/package=gggenes)  
1290 [project.org/package=gggenes](https://CRAN.R-project.org/package=gggenes)> (2020).

1291
