# Supplementary material for: Hospital environments harbor chlorhexidine tolerant bacteria potentially linked to chlorhexidine persistence in the environment
Source: bioRxiv or medRxiv preprint supplement (doi:10.1101/2024.10.07.24315058), 2024-10-08
Supplement: Supplementary file [file media-1.pdf]

## Supplementary figures S1-S8

# Hospital environments harbor chlorhexidine tolerant bacteria potentially linked to chlorhexidine persistence in the environment

Jiaxian Shen<sup>1</sup>, Yuhan Weng<sup>1</sup>, Tyler Shimada<sup>1</sup>, Meghana Karan<sup>1</sup>, Andrew Watson<sup>1</sup>, Rachel L. Medernach<sup>2</sup>, Vincent B. Young<sup>3</sup>, Mary K. Hayden<sup>2</sup>, Erica M. Hartmann<sup>1,4,5,\*</sup>

<sup>1</sup>Department of Civil and Environmental Engineering, McCormick School of Engineering, Northwestern University, USA

<sup>2</sup>Division of Infectious Diseases, Department of Internal Medicine, Rush University Medical Center, USA

<sup>3</sup>Department of Internal Medicine/Division of Infectious Diseases, Department of Microbiology & Immunology, University of Michigan Medical School, USA

<sup>4</sup>Center for Synthetic Biology, Northwestern University, USA

<sup>5</sup>Department of Medicine/Division of Pulmonary Medicine, Feinberg School of Medicine, Northwestern University, USA

\*Correspondence: Erica M. Hartmann; 2145 Sheridan Road, Tech A322, Evanston, IL 60208; Email: [erica.hartmann@northwestern.edu](mailto:erica.hartmann@northwestern.edu); Tel: 847-467-4528

Supplementary information includes 8 figures and 9 tables.

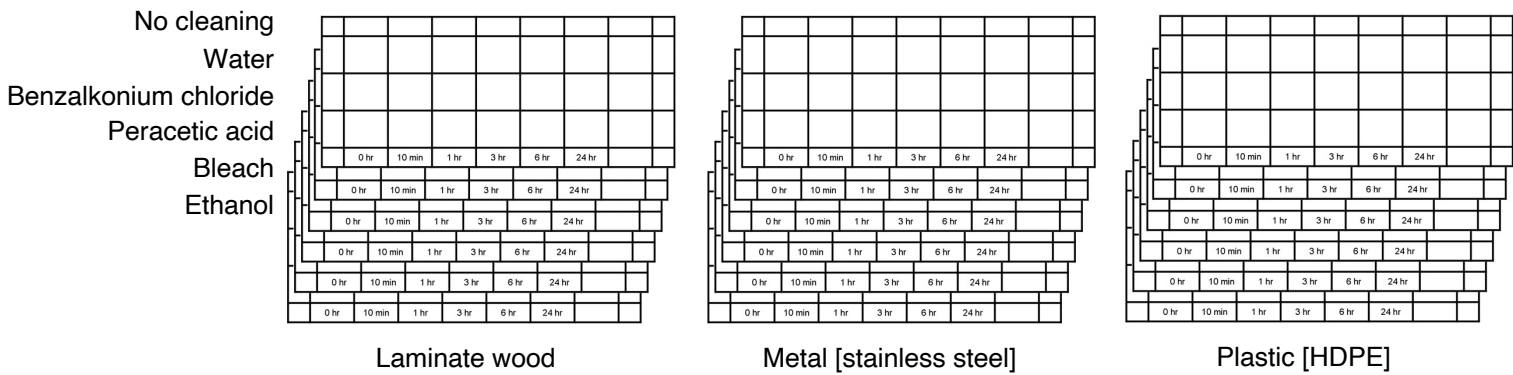

**Fig. S1 Coupons used in the microcosm experiments examining chlorhexidine persistence.** Grids on the coupons indicate specific swabbing sites.

**a**

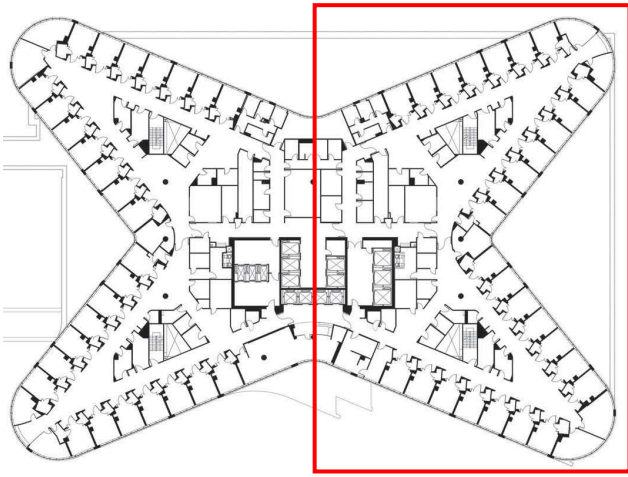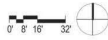

**b**

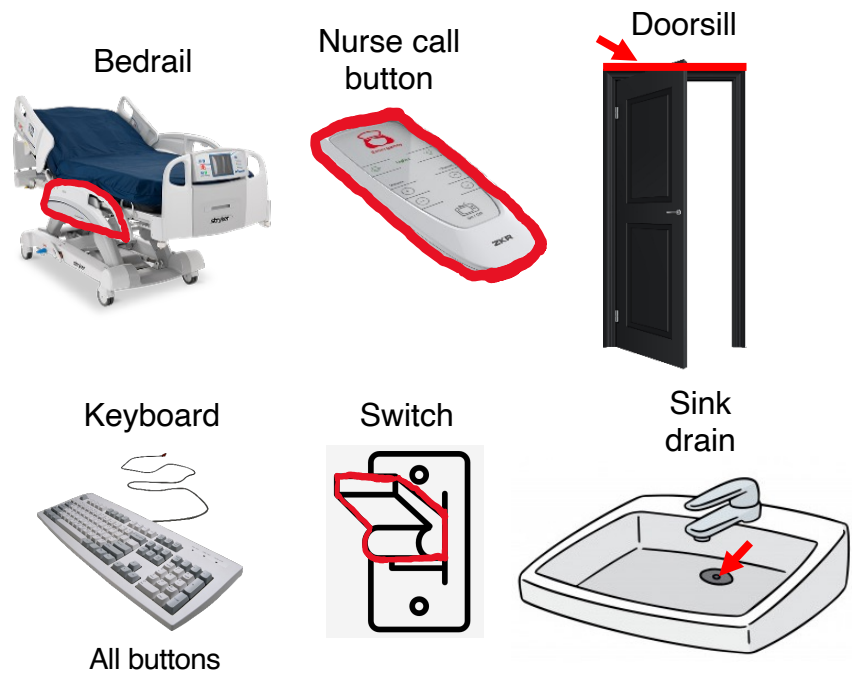

**Fig. S2 a) Floor plan of the Medical Intensive Care Unit at the sampled hospital. b) Illustrations of the swabbed area for the sampled environmental locations.**

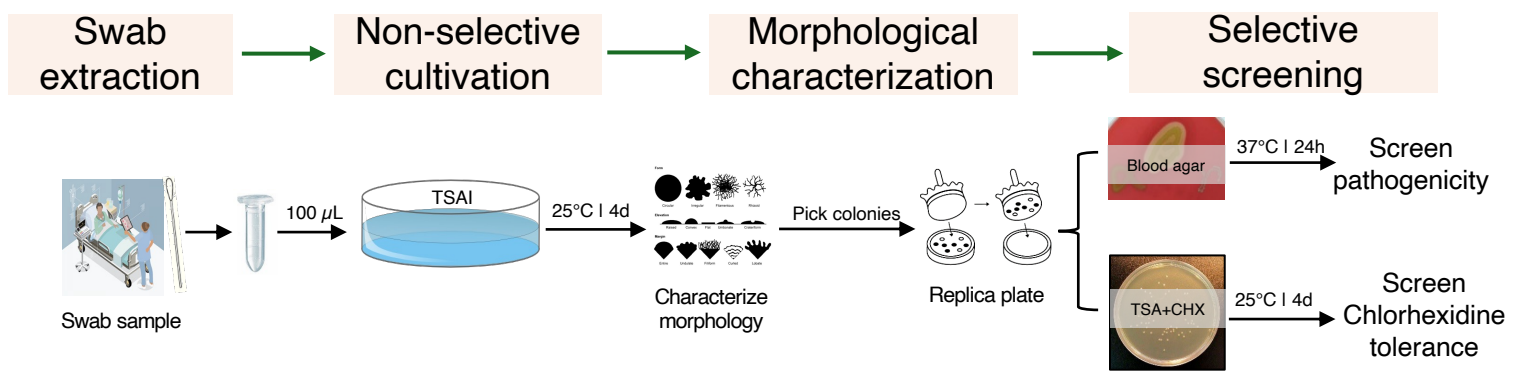

**Fig. S3 Cultivation and screening pipeline.** TSAI is tryptic soy agar (TSA) supplemented with 4 mg/L itraconazole. TSA+CHX is TSA containing 10.56 µg/mL chlorhexidine powder (equivalent to 18.75 µg/mL CHG).

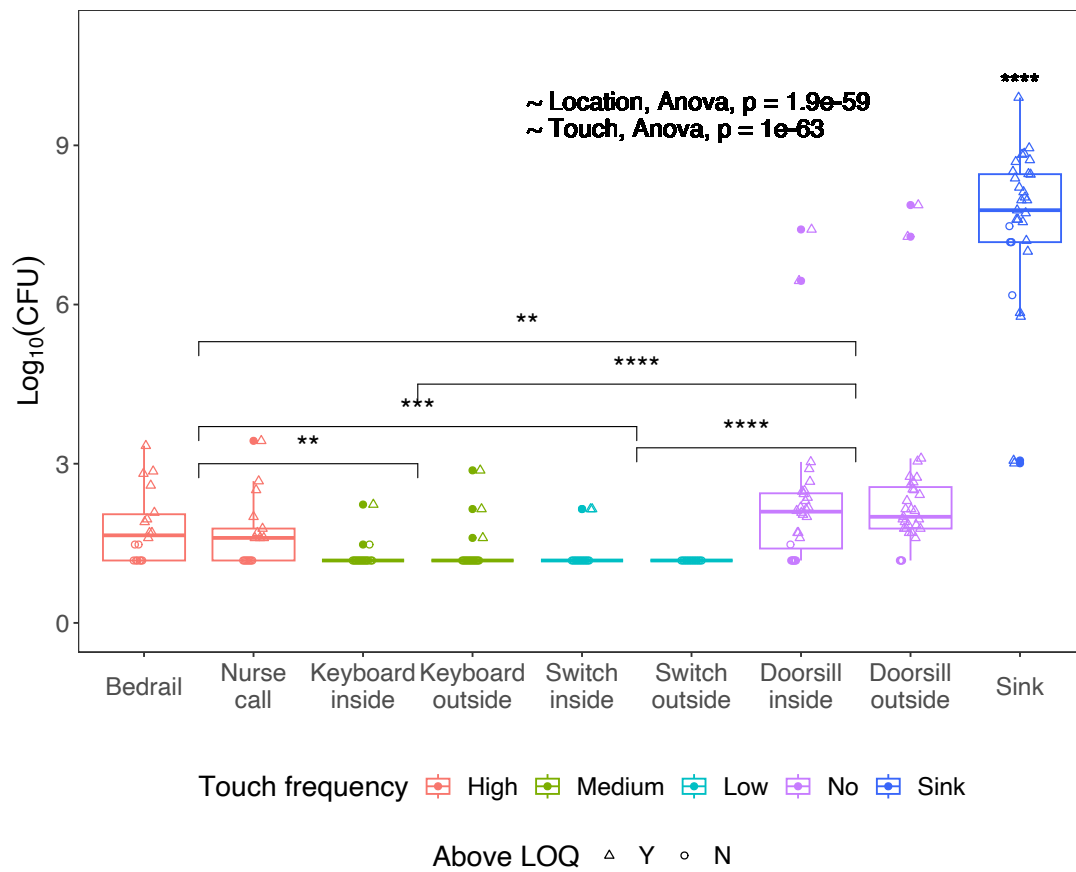

**Fig. S4 Absolute bioburden of bacteria ( $\log_{10}$ CFU) in the entirety of the dry surfaces and by swabbing the proximal sink drain.** The bacteria CFUs were not normalized by sampling area. Differences between groups were determined by unpaired  $t$ -tests with the Benjamini-Hochberg adjustment. To avoid mis-interpreting data with small colony counts, we empirically set the limit of quantification (LOQ) of our culture efforts as colony counts = 3. Values below this threshold were recorded as half of LOQ (i.e., 1.5). Nurse call button is abbreviated as nurse call in the figure.

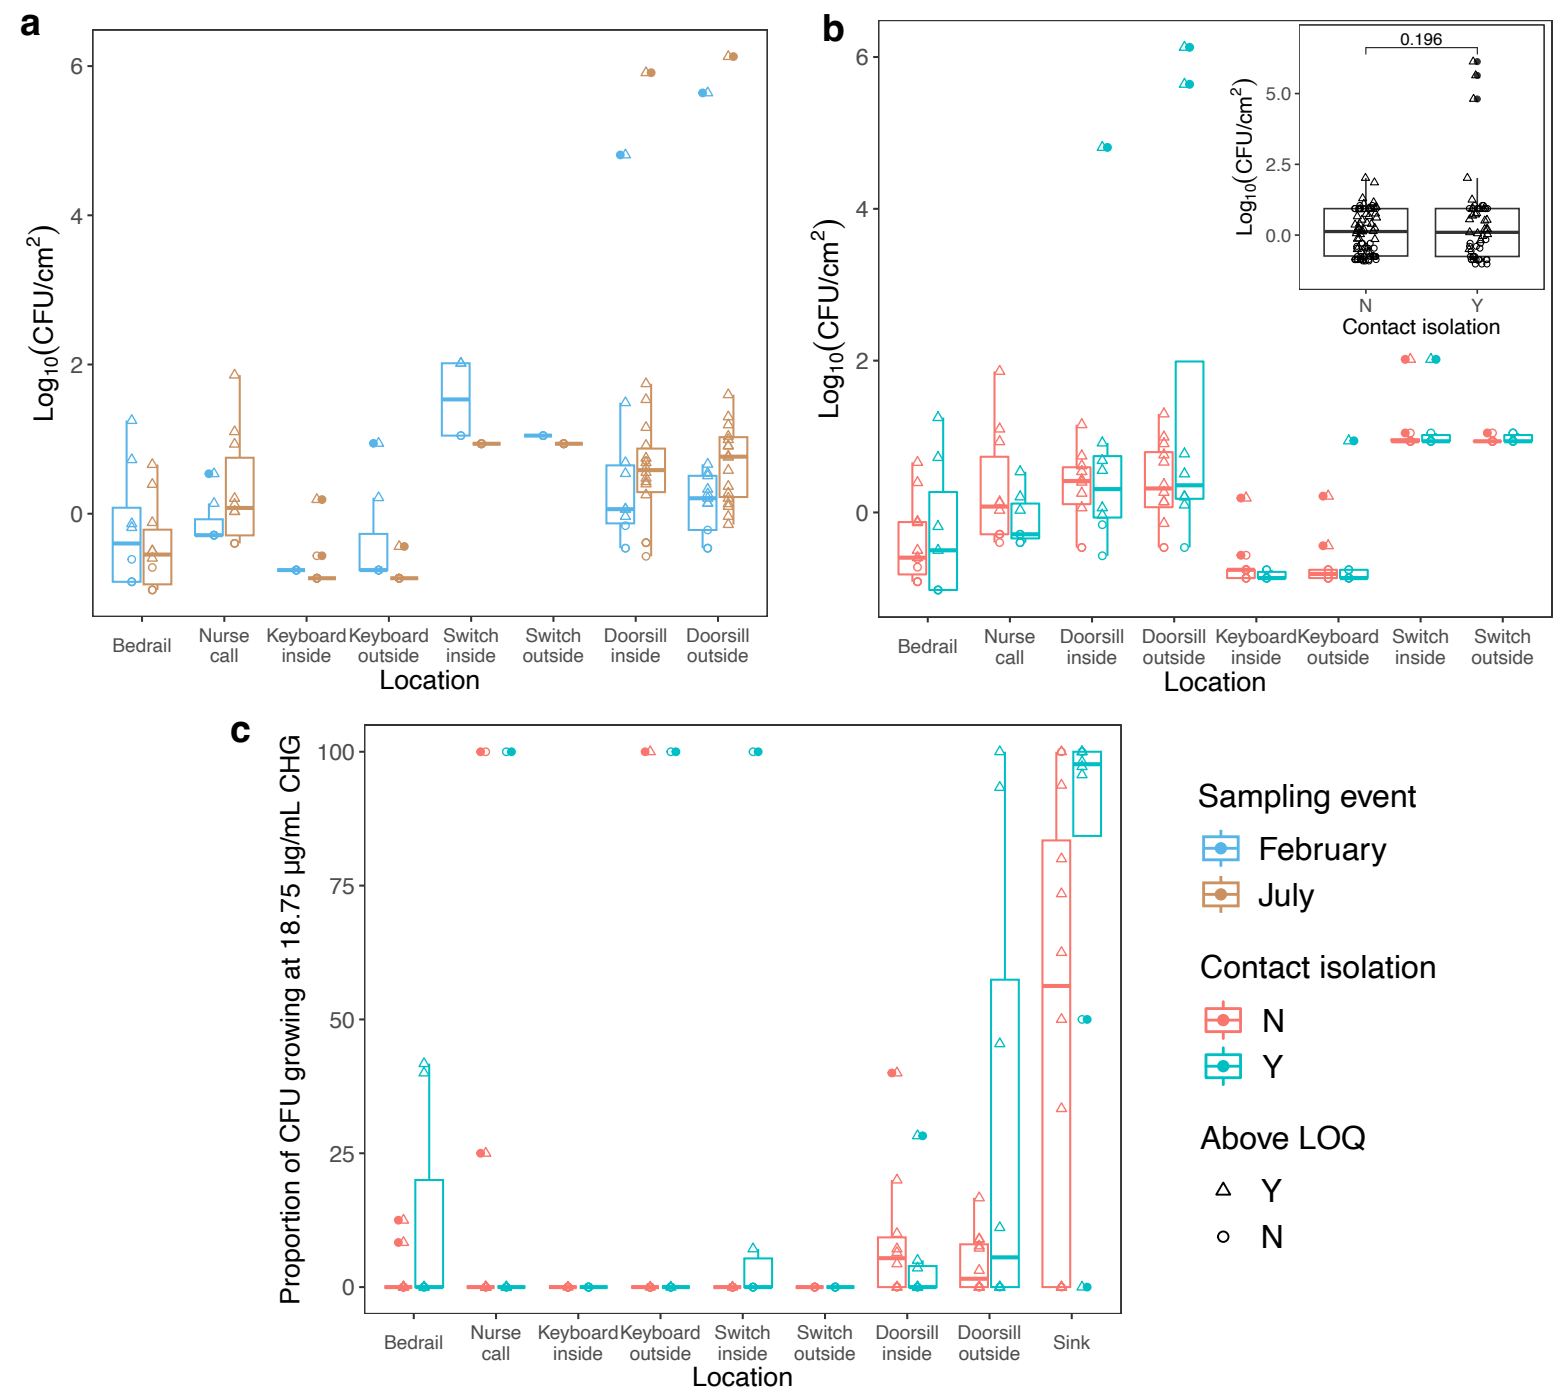

**Fig. S5 No significant differences were observed in:** **a)** Unit area bioburden of bacteria between the two sampling seasons, **b)** Unit area bioburden of bacteria between patient rooms with contact isolation and those without, and **c)** Proportions of CHG-tolerant bacteria (tolerating  $18.75 \mu\text{g}/\text{mL}$  CHG at  $25^\circ\text{C}$ ) between contact isolation levels of patient rooms. Cultivation temperature was  $25^\circ\text{C}$  for all cases. Nurse call button is abbreviated as nurse call in the figure.

- Sampling Event**  
 ● First Sampling: February 2018  
 ● Second Sampling: July 2018  
**Tree Metadata**  
 ● Novel Species  
 ● Ambiguous Genus  
 ● Ambiguous Species  
**Sampling Location**  
 ● Bedrail  
 ● Sink Drain  
 ● Doorsill

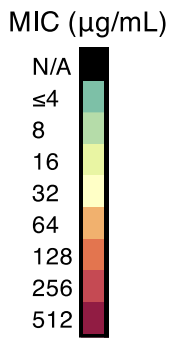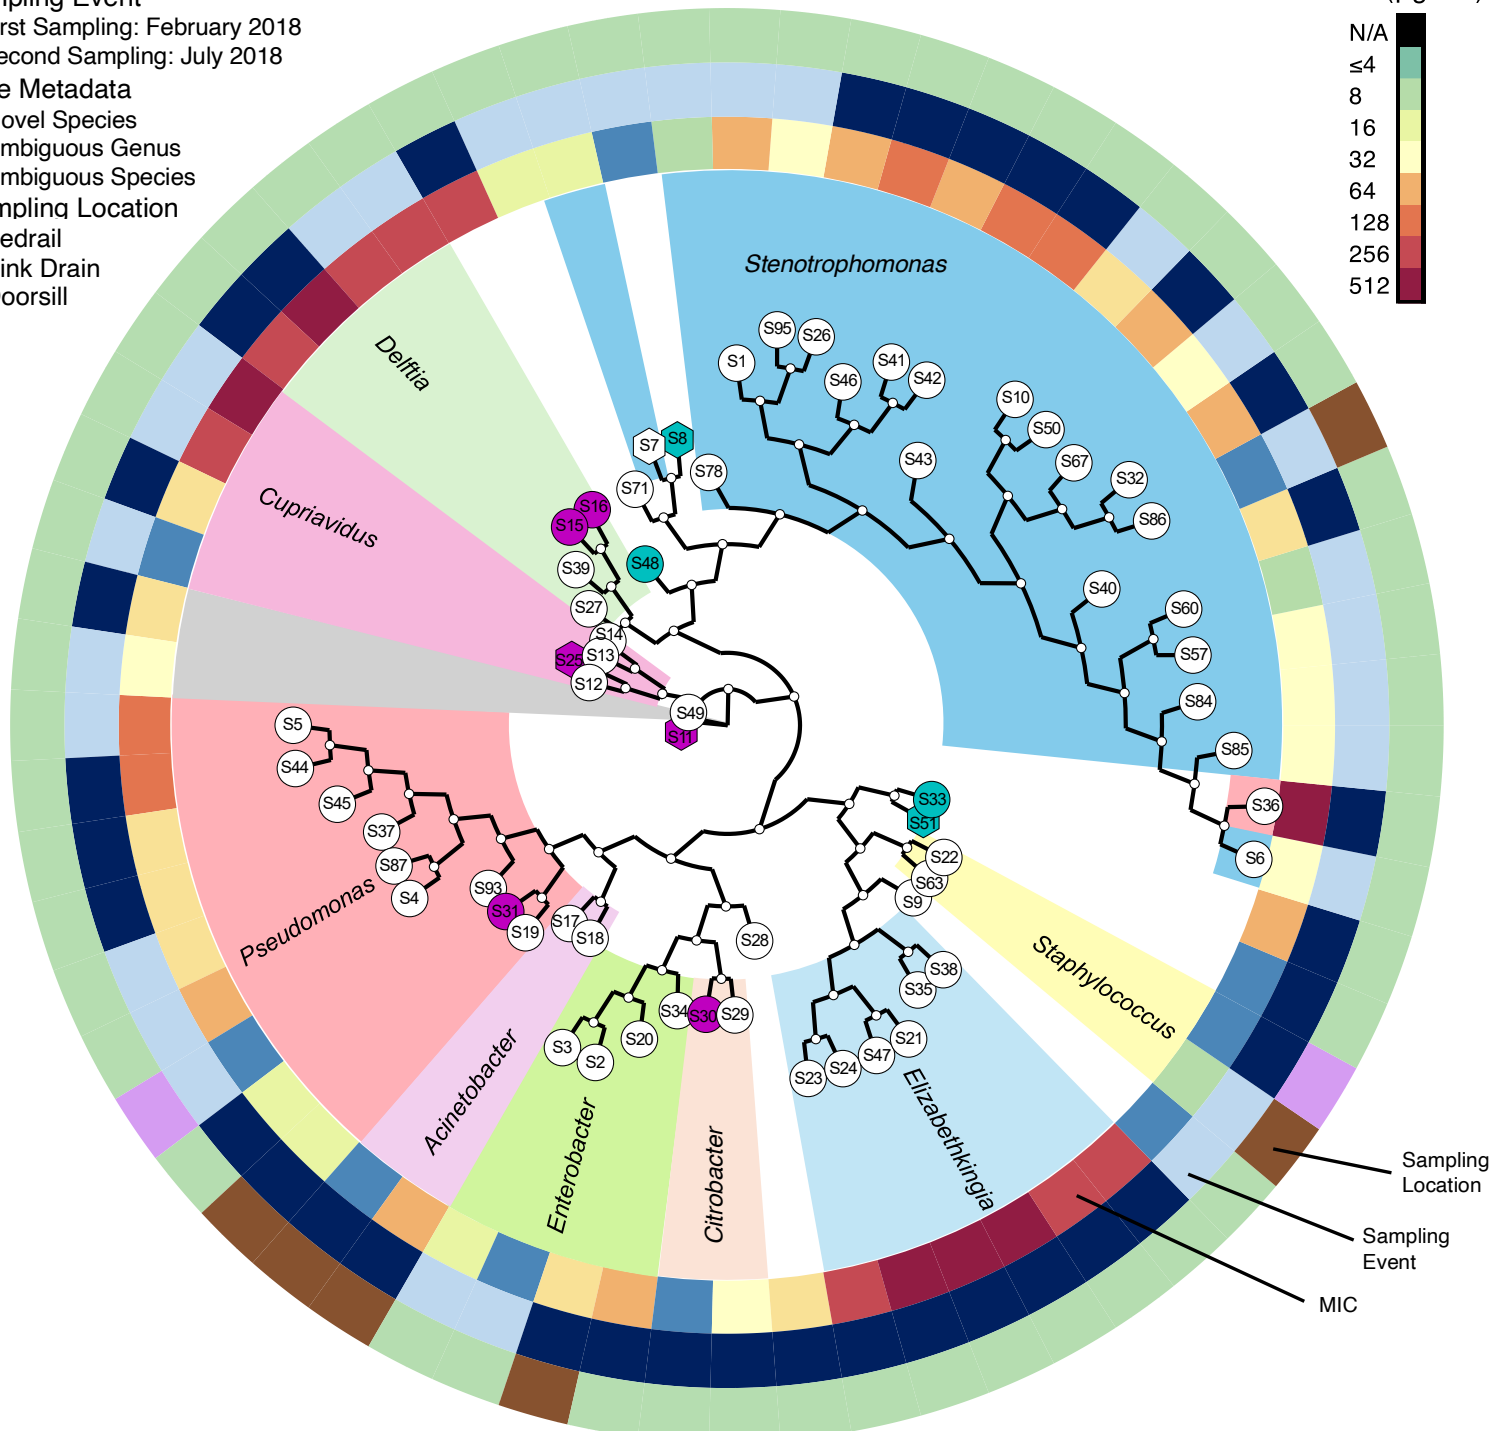

Sampling Location  
 Sampling Event  
 MIC

S49 *Achromobacter aegrifaciens*  
 S17 *Acinetobacter radioresistens*  
 S18 *Acinetobacter radioresistens*  
 S30 *Citrobacter amalonicus* or *Citrobacter freundii*  
 S29 *Citrobacter freundii*  
 S13 *Cupriavidus metallidurans*  
 S14 *Cupriavidus metallidurans*  
 S12 *Cupriavidus pauculus*  
 S27 *Delftia tsuruhatensis*  
 S39 *Delftia tsuruhatensis*  
 S15 *Delftia tsuruhatensis* or *Delftia acidovorans*  
 S16 *Delftia tsuruhatensis* or *Delftia acidovorans*  
 S48 *Delftia tsuruhatensis*, *Delftia acidovorans* or *Stenotrophomonas maltophilia*  
 S21 *Elizabethkingia miricola*  
 S23 *Elizabethkingia miricola*  
 S24 *Elizabethkingia miricola*  
 S35 *Elizabethkingia miricola*  
 S36 *Elizabethkingia miricola*  
 S38 *Elizabethkingia miricola*  
 S47 *Elizabethkingia miricola*  
 S34 *Enterobacter asburiae*

S20: *Enterobacter hormaechei*  
 S2: *Enterobacter kobei*  
 S3: *Enterobacter kobei*  
 S28: *Klebsiella michiganensis*  
 S33: *Ochrobactrum anthropi* or *Brucella anthrapi*  
 S4: *Pseudomonas aeruginosa*  
 S5: *Pseudomonas aeruginosa*  
 S37: *Pseudomonas aeruginosa*  
 S44: *Pseudomonas aeruginosa*  
 S45: *Pseudomonas aeruginosa*  
 S87: *Pseudomonas aeruginosa*  
 S93: *Pseudomonas azotifigens*  
 S19: *Pseudomonas putida*  
 S71: *Pseudomonas stutzeri*  
 S9: *Sphingobacterium siyangense*  
 S22: *Staphylococcus debuckii*  
 S63: *Staphylococcus epidermidis*  
 S1: *Stenotrophomonas maltophilia*  
 S6: *Stenotrophomonas maltophilia*  
 S10: *Stenotrophomonas maltophilia*  
 S26: *Stenotrophomonas maltophilia*

S32: *Stenotrophomonas maltophilia*  
 S40: *Stenotrophomonas maltophilia*  
 S41: *Stenotrophomonas maltophilia*  
 S42: *Stenotrophomonas maltophilia*  
 S43: *Stenotrophomonas maltophilia*  
 S46: *Stenotrophomonas maltophilia*  
 S50: *Stenotrophomonas maltophilia*  
 S57: *Stenotrophomonas maltophilia*  
 S60: *Stenotrophomonas maltophilia*  
 S67: *Stenotrophomonas maltophilia*  
 S78: *Stenotrophomonas maltophilia*  
 S84: *Stenotrophomonas maltophilia*  
 S85: *Stenotrophomonas maltophilia*  
 S86: *Stenotrophomonas maltophilia*  
 S95: *Stenotrophomonas maltophilia*  
 S51: novel species, f\_Rhizobiaceae, g\_Pseudorhizobium or g\_Rhizobium  
 S8: novel species, f\_Xanthomonadaceae, g\_Stenotrophomonas  
 S11: novel species, g\_Achromobacter  
 S25: novel species, g\_Cupriavidus  
 S7: novel species, g\_Stenotrophomonas  
 S31: undetermined species, g\_Pseudomonas

**Fig. S6 A phylogenetic tree of all sequenced isolates.**

■ *P. aeruginosa* (sampled in February)

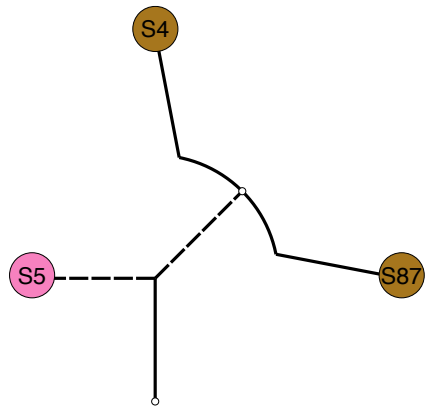

■ *P. aeruginosa* (sampled in July)

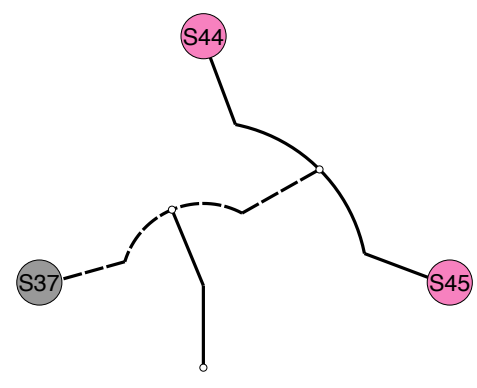

■ *S. maltophilia* (sampled in July)

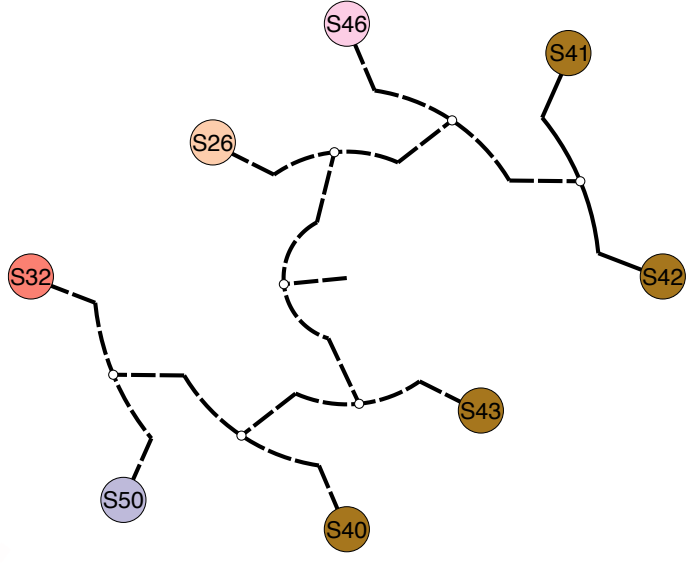

■ *D. tsuruhatensis* (sampled in July)

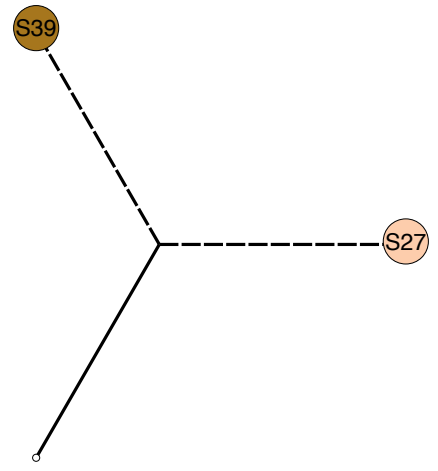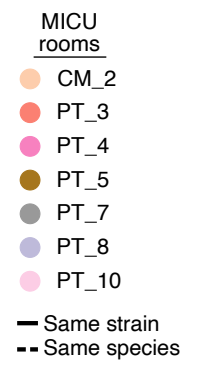

**Fig. S7 Potential dissemination of opportunistic pathogens across multiple MICU rooms.** Patient rooms were deidentified. Each panel shows one species with multiple isolates detected in sink drains of different MICU rooms during the same sampling event.



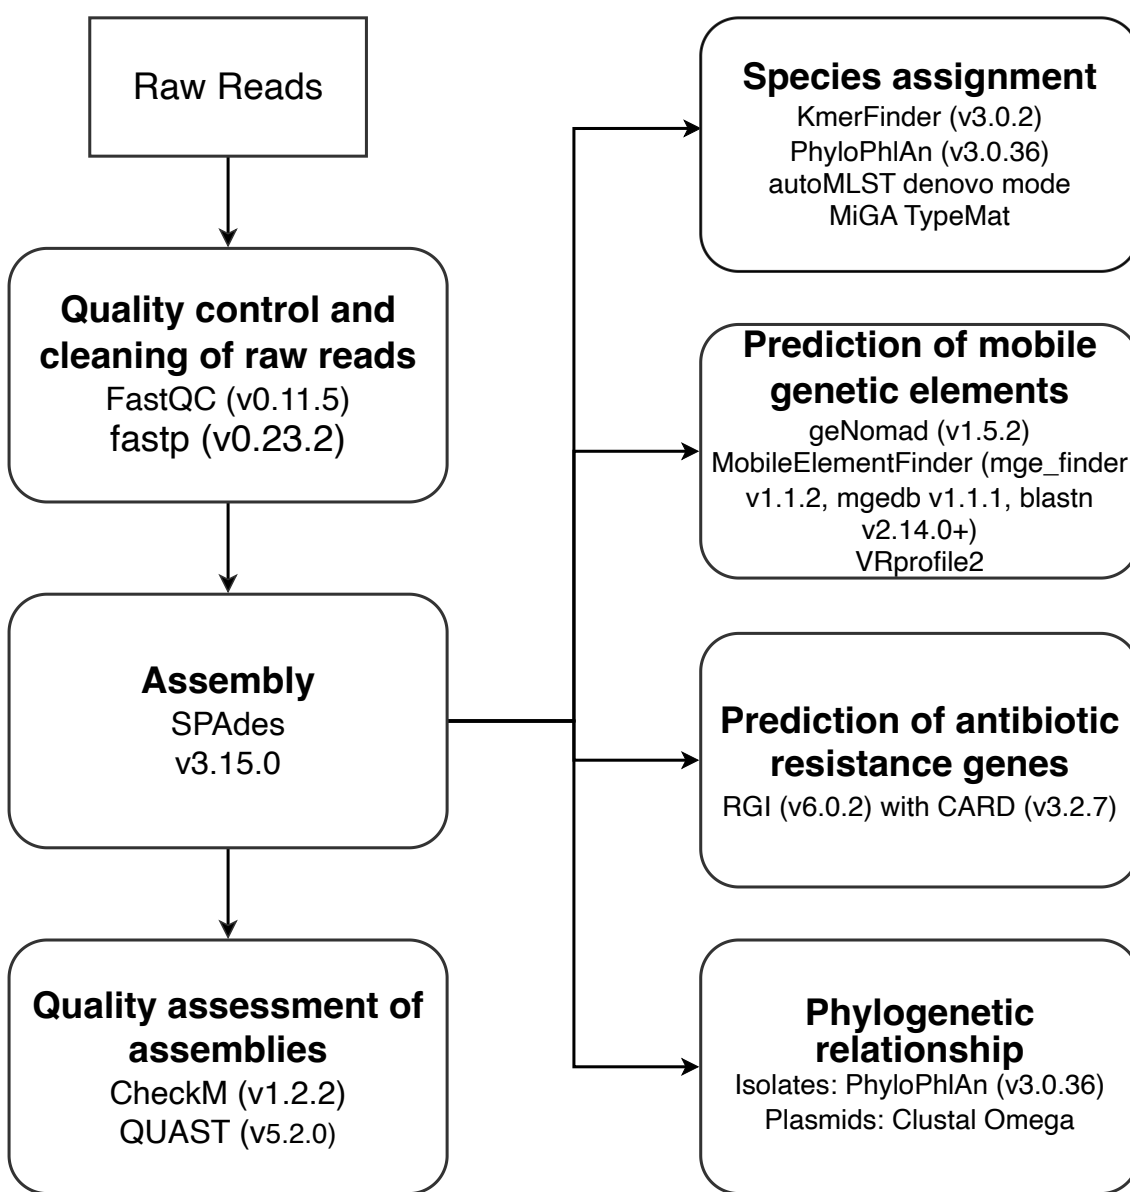

**Fig. S8 Analysis pipeline of whole-genome sequences.**
